1     **Capsicum cultivated under adverse conditions in Southern Japan produces**  
2             **higher concentrations of antioxidants and pungent components**

3

4     **Short title:** Capsicum grown in sandy soil contains increased pungent compounds and antioxidants.

5     Katsuko Kajiya<sup>1\*</sup>, Hiroki Yamanouchi<sup>2</sup>, Yurika Tanaka<sup>1</sup>, Hiroka Hayashi<sup>1</sup>, Yuji Minami<sup>1,2</sup>

6

7     <sup>1</sup> Department of Food Science & Biotechnology, Faculty of Agriculture, Kagoshima University, Kagoshima

8     890-0065, Japan

9     <sup>2</sup> Major in Biological Science & Technology, The United Graduate School of Agricultural Sciences,

10    Kagoshima University, Kagoshima 890-0065, Japan

11

12    \*Corresponding author:

13    E-mail: [kajiya@chem.agri.kagoshima-u.ac.jp](mailto:kajiya@chem.agri.kagoshima-u.ac.jp) (KK).

14

15

16

17

## 18 Abstract

19 Growing crops in sabulous soils is often challenging due to their limited oligotrophy and weak water  
20 retention. However, some plants adapt to these adverse growth conditions, and in some cases, favorable  
21 properties are imparted to the fruit. This study investigated the influence of the cultivation environment on  
22 *Capsicum* by assessing the levels and functions of both pungent components and antioxidants when  
23 cultivated in sandy soils in Southern Japan; these parameters were then compared to those in traditional  
24 tropical-origin *Capsicum*. In seven varieties of *Capsicum*, the distribution of capsaicin and dihydrocapsaicin  
25 differed between the pericarp and seeds within the placenta. The leaves and fruits of Habanero orange and  
26 Tabasco, which are the most suitable for cultivation in sandy soil, were collected during the cultivation  
27 period and analyzed in terms of their size, color, and pungent component composition. Pungent components  
28 were detected in fruits only, and not in leaf or flower samples. In particular, we found that pungent  
29 components were generally present within the seeds and placenta. Antioxidant activity and nitric oxide  
30 production within human vascular endothelial cells were also evaluated to compare the differences in their  
31 functionality. *Satsuma*-Habanero orange cultivated under adverse conditions possessed the highest  
32 antioxidant activity. Furthermore, *Satsuma*-*Capsicum* cultivated under adverse conditions exhibited higher  
33 levels of antioxidants than traditional tropical-origin peppers, and induced similar levels of nitric oxide  
34 production in the vascular endothelial cells. We concluded that *Capsicum* cultivated in harsh environments  
35 produced beneficial effects such as higher levels of antioxidants and capsaicinoids in seeds and placenta.  
36 Moreover, the fruits from these plants could be harvested for a significantly longer period and took longer to  
37 spoil than traditional *Capsicum*; thus, they show merit as a viable commercial crop in Japan.

38

39 **Keywords:** antioxidant activity; capsaicinoids; *Capsicum*; pungent component; red pepper; vascular  
40 endothelial function

41

## 42 Introduction

43 Sandy soil in coastal areas lacks nutrients and has low moisture retention, severely limiting the number of  
44 adaptable crop species that can be grown in this soil. The components and nutritional value of plants vary  
45 depending on the cultivated environment. Sandy soil has extremely low clay content and little accumulation  
46 of organic matter. Further, this soil possesses good breathability and drainage, but low water retention and  
47 natural fertility. Moreover, the soil temperature tends to rise rapidly. Therefore, it is susceptible to drought,  
48 and nutrients from added fertilizer are often removed due to leaching. The typical properties of sandy soils  
49 are strongly influenced by external environmental factors due to their low physical buffer capacity, such as  
50 earthiness, air permeability, water permeability, water retention, soil temperature, sand scattering, chemicals,  
51 nutrient sources, nutrient transfer, nutrient absorption, and soil pH, as well as biological factors such as pests  
52 and the accumulation of organic matter in the soil. The properties of sandy soil are thus variable and  
53 unstable.

54 Capsicum is a plant belonging to the family *Solanaceae*. The plant height of *Capsicum spp.* ranges from  
55 40–60 cm, and the stem splits into many branches. The leaves are mutually alternated with a long petiole and  
56 have an oval shape. After the flowers have bloomed, the plant starts bearing green fruits; inside the fruit is a  
57 cavity containing the seeds and placenta (s/p). Depending on the variety, the fruit shape may be rounded or  
58 short, and the color may differ. Many *Capsicum spp.* are spicy, and are therefore primarily used as spices,  
59 except for some sweet peppers, which are generally mild in flavor [1,2]. The main pungent components of  
60 Capsicum are capsaicinoids, including homologs such as capsaicin, dihydrocapsaicin, nordihydrocapsaicin,  
61 homocapsaicin, and homodihydrocapsaicin [3-5]. In the current study, we focused on capsaicin and  
62 dihydrocapsaicin because these compounds possess strong pungency. Moreover, Capsicum generally  
63 contains 60–70% capsaicin and 30–40% dihydrocapsaicin, with other capsaicinoids being present in trace  
64 amounts [3-5]. The concentration of pungent components in Capsicum can vary depending on the light  
65 intensity and temperature at which the plant is grown, the age of the fruit, and the position of the fruit on the  
66 plant [4,6]. The nondestructive identification of pungent component contents is useful for determining the  
67 optimum harvest time. However, the fruits are currently empirically harvested because the pungent  
68 component contents and color of the fruits are irrelevant. Thus, it is important to understand the changes in  
69 capsaicin and dihydrocapsaicin contents over time within the Capsicum fruit. Measuring the levels of

70 pungent components in various parts of the *Capsicum* plant can reveal whether they can be used as a  
71 substitute for *Capsicum* fruits in food.

72 Oxidative stress, which is caused by excessive production of active oxygen within the body, leads to  
73 obesity and lifestyle-related diseases. Therefore, the antioxidant properties of foods are important [7], and  
74 peppers are thought to possess considerable antioxidant activity. Further, nitric oxide (NO) is released from  
75 the vascular endothelial cells (VECs) to protect blood vessels by regulating their contraction and relaxation  
76 and by preventing thrombus formation due to the attachment of white blood cells and other blood  
77 components to the vascular endothelium. Traditional tropical-origin peppers influence the release of NO by  
78 endothelial cells [8,9]. However, if VECs are damaged by oxidative stress caused by reactive oxygen species  
79 or oxidized low-density lipoproteins, the production of NO is suppressed, increasing the risk of  
80 cardiovascular diseases. Thus, improving NO production by VECs is critical for protecting blood vessels.

81 The distribution of pungent components in pepper varieties cultivated in harsh environments has not yet  
82 been investigated. This study measured the concentrations of pungent components in the pericarp and  
83 placental seeds of *Satsuma-Capsicum* plants cultivated in harsh environments compared to those in  
84 traditional topical-origin peppers. We further investigated their antioxidant activity and effect on vascular  
85 endothelial function by analyzing the changes in nitric oxide (NO) production in VECs [10].

86

## 87 **Material and Methods**

### 88 **Chemicals**

89 Acetonitrile and capsaicinoids were purchased from Sigma Aldrich (St. Louis, MO, USA). Ethanol,  
90 hexane, dichloromethane, and 2,2-diphenyl-1-picrylhydrazyl (DPPH) were obtained from Fujifilm Wako  
91 Chemical Corporation (Osaka, Japan). 2,3-diaminonaphthalene (DAN) was purchased from Dojindo  
92 Laboratories (Kumamoto, Japan). Normal human VECs were obtained from Cosmo Bio Co., Ltd. (Tokyo,  
93 Japan).

94

### 95 **Sample preparation**

96 A total of seven *Capsicum* species and strains (Figure 1A) were included in this study, including *C.*

97 *chinense* (Habanero orange and Habanero red), *C. annuum* (Indonesian origin and Laris), and *C. frutescens*  
98 (Taruna pepper, Okinawan chili pepper, and Tabasco pepper). The plants were cultivated in sandy soils in  
99 southern Japan, and they were named *Satsuma-Capsicum* for convenience. *Satsuma-Capsicum* plants from  
100 each of the seven varieties were harvested when the coloration of the mature fruits exceeded 90%; this  
101 decision was based on color changes due to differences in maturation time. Two traditional tropical-origin  
102 peppers, Habanero orange and Tabasco peppers originating from the USA, were provided by Dr. Jun-Ichi  
103 Sakagami and Mr. Kenta Komori at the Laboratory of Tropical Crop Science, Faculty of Agriculture,  
104 Kagoshima University (Japan). The peppers were carefully separated into the pericarp and s/p (Figure 1B),  
105 then placed into a glass petri dish and dried using a forced convection drying oven (DO-60FA, AS ONE,  
106 Osaka, Japan) at 60 °C for 13 h. Thereafter, the thoroughly dried material was crushed using a mortar and  
107 pestle.

108

109 **Figure 1.** (A) Representative photographs of the seven *Satsuma-Capsicum* strains used in this study. (B)  
110 Sample preparation. Peppers were carefully (i) cut vertically, and then separated into (ii) the pericarp and  
111 (iii) seeds and placentas.

112

113

## 114 **Quantitative analysis of pungent components**

115 Each dried sample (10 mg) was added to a microfuge tube containing 1 mL acetonitrile, ultrasonically

116 processed (ASU-6M, AS ONE) for 1 h, and centrifuged at  $1,600 \times g$  for 10 min at 4 °C; the resulting

117 supernatant was used to measure the levels of pungent compounds. After filtration through a 0.45- $\mu$ m filter

118 (Toyo Roshi Kaisha, Tokyo Japan), the samples were analyzed using high-pressure liquid chromatography

119 (HPLC; Extrema, Jasco, Tokyo, Japan). The identification of individual compounds was performed using

120 highly selective spectral data according to the retention times of each individual compound on an

121 ultraviolet-photodiode array detector (UV-4075 and MD4010, Jasco). The conditions for HPLC analysis

122 were as follows: the C18 reverse phase column (TSK-gel ODS-100Z, 5  $\mu$ m, 4.6 mm I.D.  $\times$  150 mm, Tosoh,

123 Tokyo, Japan) and guard column (TSK-gel guardgel ODS-100Z, 5  $\mu$ m, 3.2 mm I.D.  $\times$  15 mm, Tosoh) were

124 maintained at 40 °C, and detection was performed at 280 nm. The mobile phase contained 1% acetic acid in

125 water (A) and acetonitrile (B). We used a gradient of 0 min with 50% solution B, and 0–18 min with a direct  
126 increase in solution B of up to 75%. The flow rate was 1.0 mL/min, absorption was measured at 280 nm, and  
127 the injection volume was 10  $\mu$ L.

128

## 129 **Measurement of changes in of pungent component contents in leaves** 130 **and fruits over time**

131 We selected two commonly consumed varieties of *Satsuma-Capsicum* and examined the changes in the  
132 levels of pungent components in the leaves and fruits over time. We divided the *Satsuma-Capsicum* tree into  
133 the top and bottom sections, and collected three leaves and fruits from each section. Samples were gathered  
134 from four *Satsuma-Capsicum* trees. Habanero orange and Tabasco peppers were sowed between April 14th  
135 and April 15th, 2017; the peppers were then planted in a sandy soil field on June 16th, 2017. Following  
136 planting, leaves were collected 1–2 times per week a total of thirty-two times. Collection started on July 15th  
137 (30 days after planting), as soon as the plants showed sufficient growth to collect the leaves without  
138 preventing further growth. Collection continued until December 23rd, after which withering and leaf  
139 dropping rendered collection impossible. Flowers (harvested between August 10th and 26th, 2017) and fruits  
140 (harvested between August 12th and December 23rd, 2017) were also sampled and the levels of pungent  
141 components were measured. In order to eliminate individual differences arising from harvesting, at least  
142 three leaves were collected from the top and bottom of each plant. Flowers and fruits were also collected in  
143 the same way. Prior to harvesting, the overall condition of the plants was measured to ascertain the state of  
144 growth. After acquiring images using a standard digital camera (SX720 HS, Canon, Tokyo, Japan), the  
145 length, width, and weight were recorded, and the pigment colors were measured with a color-difference  
146 meter (CR-20, Konica Minolta, Tokyo, Japan) using four measurement points per sample. Leaf pigment  
147 color was expressed using a color code conversion tool (freeware Color Converter, W3Schools) to convert  
148 from the L\*a\*b system to the RGB color coordinate system. L\* expresses brightness, where values closer to  
149 0 are closer to white, and values closer to 100 are closer to black. For a\*, negative values indicate a shift  
150 towards green, and positive values indicate a shift towards red. For b\*, negative values indicate a shift  
151 towards blue, and positive values indicate a shift towards yellow.

152 All samples were then cut with scissors. Each sample (1 g) was added to a microfuge tube containing 1

153 mL ethanol, and incubated at 4 °C for 1 week. The extracted solution from each sample was subjected to  
154 ultrasonic processing for 10 min and centrifuged at  $1,600 \times g$  for 10 min at 4 °C. The resulting supernatant  
155 was passed through a 0.45- $\mu\text{m}$  filter and used for measurement. The conditions for HPLC analysis were the  
156 same as those for the quantification of pungent components.

157

## 158 **Measurement of antioxidant activity**

159 We used the DPPH method to measure antioxidant activity [11-13]. In brief, each dried sample (50 mg)  
160 was placed in a microcentrifuge tube, to which 2 mL hexane/dichloromethane (1:1) solution was added. The  
161 mixture was vortexed, ultrasonically treated for 10 min, and centrifuged at  $1,600 \times g$  at 4 °C for 10 min;  
162 thereafter, 1 mL supernatant was collected and prepared by vacuum concentration (VEC-260, Iwaki, Tokyo,  
163 Japan). To the concentrated sample, 1 mL 50% ethanol was added, vortexed, and ultrasonically treated until  
164 the concentrate was dissolved. This sample solution (50  $\mu\text{L}$ ) was added to each well of a 96-well microplate,  
165 and then 50% ethanol was also added into each well as necessary. Then, 50  $\mu\text{L}$  800  $\mu\text{M}$  DPPH solution was  
166 added to the sample solution in the dark and incubated at room temperature (25 °C) for 20 min in the dark.  
167 Absorbance was measured at 540 nm via a microplate reader (Infinite 200 PRO, Tecan, Männedorf,  
168 Switzerland). A calibration curve was produced using the reference standard compound Trolox with a  
169 correlation coefficient of  $R^2 = 0.9983$ . Each experiment was performed in quadruplicate. The DPPH  
170 scavenging effect was calculated via the following equation: DPPH scavenging effect (%) =  $(A_0 - A_1)/A_0$   
171  $\times 100$ , where  $A_0$  is the absorbance of the control reaction, and  $A_1$  is the absorbance of the sample or  
172 standard.

173

## 174 **NO quantification using a modified Griess method**

175 Typically,  $\text{NO}_2^-$  is measured using the Griess method [14-16]. The reduction of  $\text{NO}_3^-$  mediated by nitrate  
176 reductase is used to ensure that the  $\text{NO}_2^-$  concentration represents the original NO level of a sample. A  
177 fluorescence method [17] using DAN is a more recently developed  $\text{NO}_2^-$  assay with higher sensitivity than  
178 that of the Griess method. Because  $\text{NO}_2^-$  reacts with DAN under acidic conditions to form a fluorescent  
179 adduct (naphthalenetriazole), we quantified the product by measuring its fluorescence intensity using a  
180 microplate reader. VECs from a human coronary artery were seeded at  $5.0 \times 10^4$  cells/mL and grown in

181 growth medium (HuMedia-EG2, Kurabo, Osaka, Japan) supplemented with 2% fetal bovine serum in a 5%  
182 CO<sub>2</sub> incubator (MCO-5AC, Panasonic, Osaka, Japan). When the cultured cells reached 80% confluency in  
183 the 96-well plates, incubation continued for an additional 12 h in medium with or without the addition of  
184 sample extract. Culture supernatants were collected by centrifugation at 1,000 × g for 15 min at room  
185 temperature (25 °C), and then reduced with nitrate reductase and the respective enzyme cofactors (iron,  
186 molybdenum, and cytochrome) for 30 min at 37 °C. This was followed by 15-min incubation with DAN.  
187 Fluorescence intensity was measured at an excitation of 360 nm and emission of 450 nm. The concentration  
188 of NO per sample was calculated by transforming raw data using a calibration curve (correlation coefficient  
189 R<sup>2</sup> = 0.9905) prepared with NaNO<sub>3</sub>. The results were expressed as relative values derived from a comparison  
190 with the control value of 1.

191

## 192 **Statistical Analysis**

193 Quantitative analysis of the pungent components involved measuring the changes in the contents of  
194 pungent components in leaves and fruits over time, measuring antioxidant activity, and NO quantification  
195 using a modified Griess method. Each analysis was repeated four times independently. Significant  
196 differences among all groups were assessed using Student's *t*-test and analysis of variance (ANOVA). Data  
197 were shown as the mean ± standard deviation (SD). A value of *P* < 0.05 was considered statistically  
198 significant.

199

## 200 **Results and Discussion**

201 The capsaicinoid contents of the seven *Satsuma*-Capsicum strains grown in sandy soils were separated  
202 into pericarp plus s/p (Figure 1). Calibration curves for capsaicin and dihydrocapsaicin were obtained for  
203 each standard. The correlation coefficients were R<sup>2</sup> > 0.9998 (capsaicin) and R<sup>2</sup> > 0.9996 (dihydrocapsaicin).  
204 Chromatograms showed retention times of 9.1 min for capsaicin and 12.5 min for dihydrocapsaicin. The  
205 pungent component contents for the pericarps and s/p per 1 g of each cultivar of Capsicum was quantified as  
206 depicted in Figure 2. The s/p from *Satsuma*-Habanero orange, *Satsuma*-Taruna, and *Satsuma*-Tabasco  
207 peppers contained higher concentrations of pungent components than the pericarps. Previous studies have  
208 reported that pungent components migrate and disperse from the placenta to the pericarp [18-20]. Thus, it is



209 possible that the transition of pungent components in *Satsuma*-Habanero red, *Satsuma*-Indonesian origin, and  
210 *Satsuma*-Okinawan chili pepper, and that of Habanero orange in tropical-origin pepper, was faster than that  
211 in other cultivars. Furthermore, s/p from Habanero orange and Tabasco pepper *Satsuma*-Capsicum plants  
212 contained higher levels of capsaicinoids than those from tropical-origin peppers. On the other hand, their  
213 levels in pericarps were similar in both groups. In Habanero orange and Tabasco pepper, pungent  
214 components were not detected in any of the leaf or flower samples. Thus, it is likely that Capsicum cultivated  
215 under adverse growing conditions contained higher levels of capsaicinoids in the s/p.

216

217 **Figure 2.** Quantification of capsaicinoids from *Satsuma*-Capsicum and tropical-origin peppers. Black bars  
218 represent capsaicin, while white bars represent dihydrocapsaicin. Peri, pericarps; s/p, seeds and placentas. \**P*  
219 < 0.05 versus total capsaicinoids in pericarps from the same pepper.

220

221 In *Satsuma*-Capsicum, the bottom leaves from Habanero orange (Table 1) and Tabasco pepper (Table 2)  
222 were deeper in color and larger than the top leaves. In December, when the temperature rapidly decreased,  
223 the leaves shriveled and turned yellow, and the fruit withered. After bearing fruit, the lengths of the leaves  
224 exceeded 10 cm. However, pungent components were not detected in any leaf or flower samples. The  
225 pungent compounds in the fruit of the Habanero orange reached maximum levels approximately 136 days  
226 after planting Habanero orange (approximately 86 days after flowering and fruiting; collection No. 18), and  
227 approximately 113 days after planting Tabasco pepper (approximately 63 days after flowering and fruiting;  
228 collection No. 21). The peak point varied between cultivars (Figure 3). Even after the leaves yellowed in  
229 December, the withered fruit contained abundant levels of pungent components. We did not identify any  
230 correlations between the pungent component contents in the fruit and the color of the leaves and fruit. In  
231 order to collect the fruits at an optimal time, it was necessary to consider the time between planting,  
232 flowering, and fruiting, rather than simply observing visible changes. Furthermore, *Satsuma*-Capsicum was  
233 slower to wither than tropical-origin peppers and could be harvested for a longer time period in our study.

234

235 **Table 1.** Leaf characteristics during the growth period of the *Satsuma*-Habanero orange pepper.

236

| Collection # | 1                                                                                 |                                                                                   | 2                                                                                 |                                                                                   | 3                                                                                   |                                                                                     | 4                                                                                   |                                                                                     | 5                                                                                   |                                                                                     |
|--------------|-----------------------------------------------------------------------------------|-----------------------------------------------------------------------------------|-----------------------------------------------------------------------------------|-----------------------------------------------------------------------------------|-------------------------------------------------------------------------------------|-------------------------------------------------------------------------------------|-------------------------------------------------------------------------------------|-------------------------------------------------------------------------------------|-------------------------------------------------------------------------------------|-------------------------------------------------------------------------------------|
| Date         | 7/15/2017                                                                         |                                                                                   | 7/22/2017                                                                         |                                                                                   | 7/29/2017                                                                           |                                                                                     | 8/5/2017                                                                            |                                                                                     | 8/10/2017                                                                           |                                                                                     |
| Position     | Top                                                                               | Bottom                                                                            | Top                                                                               | Bottom                                                                            | Top                                                                                 | Bottom                                                                              | Top                                                                                 | Bottom                                                                              | Top                                                                                 | Bottom                                                                              |
| Length (cm)  | 5.7                                                                               | 5.6                                                                               | 7.5                                                                               | 6.8                                                                               | 4.7                                                                                 | 6.6                                                                                 | 6.9                                                                                 | 8.1                                                                                 | 6.3                                                                                 | 9.3                                                                                 |
| Width (cm)   | 3.3                                                                               | 3.1                                                                               | 3.6                                                                               | 4.1                                                                               | 2.2                                                                                 | 3.4                                                                                 | 3.3                                                                                 | 4.8                                                                                 | 2.7                                                                                 | 4.3                                                                                 |
| Weight (g)   | 0.246                                                                             | 0.270                                                                             | 0.361                                                                             | 0.483                                                                             | 0.136                                                                               | 0.377                                                                               | 0.317                                                                               | 0.735                                                                               | 0.203                                                                               | 0.582                                                                               |
| L*           | 46.02±1.90                                                                        | 49.4±2.28                                                                         | 47.39±1.53                                                                        | 47.6±2.85                                                                         | 36.53±1.35                                                                          | 39.13±0.61                                                                          | 36.23±1.36                                                                          | 35.02±2.88                                                                          | 42.75±0.95                                                                          | 45.53±3.09                                                                          |
| a*           | -9.08±0.30                                                                        | -10.09±0.16                                                                       | -10.12±0.69                                                                       | -10.37±0.46                                                                       | -7.28±0.32                                                                          | -8.75±0.34                                                                          | -7.64±0.29                                                                          | -8.42±0.9                                                                           | -8.55±0.63                                                                          | -10.08±0.52                                                                         |
| b*           | 24.18±1.68                                                                        | 27.85±3.2                                                                         | 22.77±3.41                                                                        | 24.88±3.83                                                                        | 16.84±1.61                                                                          | 23.05±0.94                                                                          | 18.03±1.32                                                                          | 19.5±3.41                                                                           | 18.58±2.09                                                                          | 24.85±3.64                                                                          |
| Color        |  |  |  |  |  |  |  |  |  |  |

237

| Collection # | 6                                                                                   |                                                                                     | 7                                                                                   |                                                                                     | 8                                                                                     |                                                                                       | 9                                                                                     |                                                                                       | 10                                                                                    |                                                                                       |
|--------------|-------------------------------------------------------------------------------------|-------------------------------------------------------------------------------------|-------------------------------------------------------------------------------------|-------------------------------------------------------------------------------------|---------------------------------------------------------------------------------------|---------------------------------------------------------------------------------------|---------------------------------------------------------------------------------------|---------------------------------------------------------------------------------------|---------------------------------------------------------------------------------------|---------------------------------------------------------------------------------------|
| Date         | 8/12/2017                                                                           |                                                                                     | 8/17/2017                                                                           |                                                                                     | 8/19/2017                                                                             |                                                                                       | 8/23/2017                                                                             |                                                                                       | 8/26/2017                                                                             |                                                                                       |
| Position     | Top                                                                                 | Bottom                                                                              | Top                                                                                 | Bottom                                                                              | Top                                                                                   | Bottom                                                                                | Top                                                                                   | Bottom                                                                                | Top                                                                                   | Bottom                                                                                |
| Length (cm)  | 5.7                                                                                 | 9.0                                                                                 | 7.3                                                                                 | 11.2                                                                                | 5.8                                                                                   | 12.5                                                                                  | 5.7                                                                                   | 11.4                                                                                  | 5.9                                                                                   | 4.5                                                                                   |
| Width (cm)   | 2.8                                                                                 | 4.5                                                                                 | 3.3                                                                                 | 6.0                                                                                 | 2.7                                                                                   | 6.6                                                                                   | 2.8                                                                                   | 6.1                                                                                   | 2.7                                                                                   | 2.3                                                                                   |
| Weight (g)   | 0.188                                                                               | 0.527                                                                               | 0.303                                                                               | 0.876                                                                               | 0.172                                                                                 | 1.023                                                                                 | 0.174                                                                                 | 0.922                                                                                 | 0.153                                                                                 | 0.781                                                                                 |
| L*           | 35.68±1.18                                                                          | 33.37±1.23                                                                          | 36.32±1.68                                                                          | 34.03±1.05                                                                          | 35.43±0.86                                                                            | 32.45±1.71                                                                            | 39.72±1.62                                                                            | 34.05±0.36                                                                            | 44.6±1.94                                                                             | 42.33±1.05                                                                            |
| a*           | -7.82±0.35                                                                          | -8.49±0.23                                                                          | -7.67±0.31                                                                          | -8.13±0.23                                                                          | -7.18±0.2                                                                             | -7.13±0.11                                                                            | -8.09±0.52                                                                            | -7.88±0.09                                                                            | -9.49±0.44                                                                            | -10±0.16                                                                              |
| b*           | 17.03±1.3                                                                           | 18.49±0.91                                                                          | 19.79±1.19                                                                          | 17.78±1.24                                                                          | 17.22±1.38                                                                            | 15.53±1.13                                                                            | 21±2.04                                                                               | 17.88±0.8                                                                             | 23.83±1.64                                                                            | 23.68±0.82                                                                            |
| Color        |  |  |  |  |  |  |  |  |  |  |

238

| Collection # | 11        |        | 12       |        | 13       |        | 14        |        | 15        |        |
|--------------|-----------|--------|----------|--------|----------|--------|-----------|--------|-----------|--------|
| Date         | 8/30/2017 |        | 9/2/2017 |        | 9/6/2017 |        | 9/13/2017 |        | 9/16/2017 |        |
| Position     | Top       | Bottom | Top      | Bottom | Top      | Bottom | Top       | Bottom | Top       | Bottom |
| Length (cm)  | 5.5       | 10.4   | 5.7      | 12.0   | 4.6      | 13.1   | 5.2       | 14.0   | 4.8       | 12.6   |
| Width (cm)   | 2.4       | 4.5    | 2.6      | 6.3    | 2.2      | 7.2    | 2.5       | 6.7    | 2.1       | 6.0    |

|            |                                                                                   |                                                                                   |                                                                                   |                                                                                   |                                                                                     |                                                                                     |                                                                                     |                                                                                     |                                                                                     |                                                                                     |
|------------|-----------------------------------------------------------------------------------|-----------------------------------------------------------------------------------|-----------------------------------------------------------------------------------|-----------------------------------------------------------------------------------|-------------------------------------------------------------------------------------|-------------------------------------------------------------------------------------|-------------------------------------------------------------------------------------|-------------------------------------------------------------------------------------|-------------------------------------------------------------------------------------|-------------------------------------------------------------------------------------|
| Weight (g) | 0.162                                                                             | 0.536                                                                             | 0.177                                                                             | 0.994                                                                             | 0.122                                                                               | 1.208                                                                               | 0.165                                                                               | 1.135                                                                               | 0.117                                                                               | 0.864                                                                               |
| L*         | 39.88±2.13                                                                        | 34.03±0.24                                                                        | 38.87±1.9                                                                         | 32.78±1.08                                                                        | 36.9±1.39                                                                           | 32.45±0.63                                                                          | 39.6±1.87                                                                           | 32.13±0.94                                                                          | 38.73±1.73                                                                          | 36.43±0.27                                                                          |
| a*         | -7.47±0.71                                                                        | -8.28±0.13                                                                        | -8.25±0.42                                                                        | -8.55±0.17                                                                        | -8.54±0.3                                                                           | -8.18±0.15                                                                          | -8.85±0.33                                                                          | -8.75±0.19                                                                          | -8.93±0.58                                                                          | -9.35±0.25                                                                          |
| b*         | 23.37±3.15                                                                        | 19.08±0.43                                                                        | 23.12±1.18                                                                        | 18.18±1.45                                                                        | 21.09±0.7                                                                           | 16.38±0.79                                                                          | 22.68±1.33                                                                          | 18.18±1.09                                                                          | 18.73±2.29                                                                          | 21.85±0.68                                                                          |
| Color      |  |  |  |  |  |  |  |  |  |  |

239

|              |                                                                                   |                                                                                   |                                                                                   |                                                                                   |                                                                                     |                                                                                     |                                                                                     |                                                                                     |                                                                                     |                                                                                     |
|--------------|-----------------------------------------------------------------------------------|-----------------------------------------------------------------------------------|-----------------------------------------------------------------------------------|-----------------------------------------------------------------------------------|-------------------------------------------------------------------------------------|-------------------------------------------------------------------------------------|-------------------------------------------------------------------------------------|-------------------------------------------------------------------------------------|-------------------------------------------------------------------------------------|-------------------------------------------------------------------------------------|
| Collection # | 16                                                                                |                                                                                   | 17                                                                                |                                                                                   | 18                                                                                  |                                                                                     | 19                                                                                  |                                                                                     | 20                                                                                  |                                                                                     |
| Date         | 9/23/2017                                                                         |                                                                                   | 9/30/2017                                                                         |                                                                                   | 10/7/2017                                                                           |                                                                                     | 10/14/2017                                                                          |                                                                                     | 10/21/2017                                                                          |                                                                                     |
| Position     | Top                                                                               | Bottom                                                                            | Top                                                                               | Bottom                                                                            | Top                                                                                 | Bottom                                                                              | Top                                                                                 | Bottom                                                                              | Top                                                                                 | Bottom                                                                              |
| Length (cm)  | 5.6                                                                               | 11.9                                                                              | 4.5                                                                               | 12.5                                                                              | 5.5                                                                                 | 13.5                                                                                | 6.2                                                                                 | 14.0                                                                                | 5.4                                                                                 | 9.6                                                                                 |
| Width (cm)   | 2.2                                                                               | 5.7                                                                               | 2.1                                                                               | 6.3                                                                               | 2.3                                                                                 | 6.5                                                                                 | 2.5                                                                                 | 6.5                                                                                 | 2.3                                                                                 | 5.0                                                                                 |
| Weight (g)   | 0.164                                                                             | 0.841                                                                             | 0.108                                                                             | 0.963                                                                             | 0.164                                                                               | 1.290                                                                               | 0.181                                                                               | 1.215                                                                               | 0.153                                                                               | 0.620                                                                               |
| L*           | 39.25±1.42                                                                        | 35.28±1.18                                                                        | 39.19±1.19                                                                        | 33.1±0.22                                                                         | 38.62±1.41                                                                          | 33.13±0.94                                                                          | 39.07±1.54                                                                          | 35.73±0.78                                                                          | 40.02±4.26                                                                          | 37.28±0.54                                                                          |
| a*           | -8.47±0.28                                                                        | -9.28±0.27                                                                        | -7.84±0.22                                                                        | -8.23±0.09                                                                        | -7.88±0.18                                                                          | -8.5±0                                                                              | -8.2±0.24                                                                           | -8.68±0.2                                                                           | -8.2±1.04                                                                           | -9.38±0.15                                                                          |
| b*           | 20.58±1.29                                                                        | 20.73±1.21                                                                        | 21.23±0.75                                                                        | 16.6±0.23                                                                         | 18.05±1.61                                                                          | 16.95±0.54                                                                          | 20.77±1.5                                                                           | 19.38±1.32                                                                          | 21.09±5.95                                                                          | 21.88±0.56                                                                          |
| Color        |  |  |  |  |  |  |  |  |  |  |

240

|              |            |            |            |             |            |            |            |            |            |            |
|--------------|------------|------------|------------|-------------|------------|------------|------------|------------|------------|------------|
| Collection # | 21         |            | 22         |             | 23         |            | 24         |            | 25         |            |
| Date         | 10/30/2017 |            | 11/4/2017  |             | 11/9/2017  |            | 11/15/2017 |            | 11/18/2017 |            |
| Position     | Top        | Bottom     | Top        | Bottom      | Top        | Bottom     | Top        | Bottom     | Top        | Bottom     |
| Length (cm)  | 5.1        | 13.3       | 5.1        | 10.9        | 6.0        | 11.1       | 4.7        | 10.7       | 5.3        | 10.6       |
| Width (cm)   | 2.0        | 6.7        | 2.7        | 5.9         | 2.5        | 5.6        | 2.1        | 5.0        | 2.2        | 4.8        |
| Weight (g)   | 0.14       | 1.122      | 0.134      | 0.895       | 0.176      | 0.701      | 0.123      | 0.758      | 0.171      | 0.599      |
| L*           | 37.24±0.95 | 37.49±1.05 | 49.85±2.69 | 49.2±4.32   | 46.55±3.12 | 52.73±1.76 | 40.28±3.27 | 43.04±3.35 | 41.18±1.55 | 43.92±1.45 |
| a*           | -8.25±0.18 | -9.38±0.12 | -9.42±0.68 | -10.17±0.27 | -7.75±0.48 | -7.58±0.99 | -6.48±0.54 | -7.92±0.7  | -6.77±0.92 | -6.8±0.87  |
| b*           | 20.59±0.99 | 24.08±1.28 | 30.58±4.64 | 33.18±6.1   | 25.27±4.56 | 38.05±2.74 | 24.87±4.54 | 29.39±5.48 | 21.88±4.63 | 32.59±2.77 |

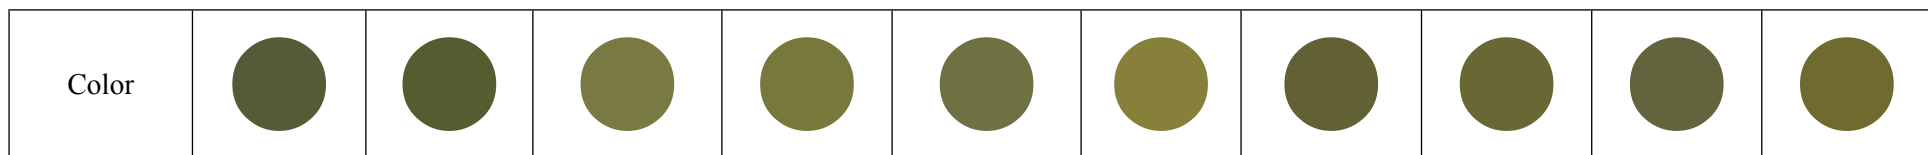

241

| Collection # | 26                                                                                |                                                                                   | 27                                                                                |                                                                                   | 28                                                                                  |                                                                                     | 29                                                                                  |                                                                                     | 30                                                                                  |                                                                                     |
|--------------|-----------------------------------------------------------------------------------|-----------------------------------------------------------------------------------|-----------------------------------------------------------------------------------|-----------------------------------------------------------------------------------|-------------------------------------------------------------------------------------|-------------------------------------------------------------------------------------|-------------------------------------------------------------------------------------|-------------------------------------------------------------------------------------|-------------------------------------------------------------------------------------|-------------------------------------------------------------------------------------|
| Date         | 11/25/2017                                                                        |                                                                                   | 12/2/2017                                                                         |                                                                                   | 12/6/2017                                                                           |                                                                                     | 12/9/2017                                                                           |                                                                                     | 12/13/2017                                                                          |                                                                                     |
| Position     | Top                                                                               | Bottom                                                                            | Top                                                                               | Bottom                                                                            | Top                                                                                 | Bottom                                                                              | Top                                                                                 | Bottom                                                                              | Top                                                                                 | Bottom                                                                              |
| Length (cm)  | 5.1                                                                               | 11.5                                                                              | 7.0                                                                               | 11.8                                                                              | 5.2                                                                                 | 8.9                                                                                 | 5.8                                                                                 | 9                                                                                   | 5.9                                                                                 | 9.1                                                                                 |
| Width (cm)   | 2.1                                                                               | 5.7                                                                               | 2.6                                                                               | 5.3                                                                               | 2.1                                                                                 | 4.6                                                                                 | 2.5                                                                                 | 4.2                                                                                 | 2.2                                                                                 | 4.1                                                                                 |
| Weight (g)   | 0.155                                                                             | 0.838                                                                             | 0.253                                                                             | 0.817                                                                             | 0.154                                                                               | 0.467                                                                               | 0.201                                                                               | 0.504                                                                               | 0.153                                                                               | 0.439                                                                               |
| L*           | 42.2±6.57                                                                         | 42.25±2.07                                                                        | 45.75±1.21                                                                        | 42.78±3.01                                                                        | 41.35±1.7                                                                           | 48.28±4.01                                                                          | 44.23±0.97                                                                          | 48.5±2.25                                                                           | 47.03±1.7                                                                           | 52.57±1.31                                                                          |
| a*           | -5.27±0.56                                                                        | -7.03±0.69                                                                        | -4.68±0.75                                                                        | -6.58±2.09                                                                        | -3.42±1.74                                                                          | -2.99±1.21                                                                          | -4.45±0.99                                                                          | -0.58±1.7                                                                           | -1.4±1.18                                                                           | 0.82±1.07                                                                           |
| b*           | 22.08±0.81                                                                        | 31.4±3.09                                                                         | 29.08±4.8                                                                         | 30.22±4.66                                                                        | 24.62±2.53                                                                          | 32.37±9.21                                                                          | 29.88±2.71                                                                          | 37.99±2.96                                                                          | 30.33±4.48                                                                          | 40.4±2.56                                                                           |
| Color        |  |  |  |  |  |  |  |  |  |  |

242

| Collection # | 31                                                                                  |                                                                                     | 32                                                                                  |                                                                                     |
|--------------|-------------------------------------------------------------------------------------|-------------------------------------------------------------------------------------|-------------------------------------------------------------------------------------|-------------------------------------------------------------------------------------|
| Date         | 12/20/2017                                                                          |                                                                                     | 12/23/2017                                                                          |                                                                                     |
| Position     | Top                                                                                 | Bottom                                                                              | Top                                                                                 | Bottom                                                                              |
| Length (cm)  | 4.2                                                                                 | 6.4                                                                                 | 2.6                                                                                 | 7.7                                                                                 |
| Width (cm)   | 1.7                                                                                 | 1.7                                                                                 | 1.1                                                                                 | 3.5                                                                                 |
| Weight (g)   | 0.05                                                                                | 0.142                                                                               | 0.023                                                                               | 0.190                                                                               |
| L*           | 47.88±11.7                                                                          | 49.15±3.1                                                                           | 39.72±5.3                                                                           | 40.67±3.23                                                                          |
| a*           | 1.7±1.05                                                                            | 4.99±2.39                                                                           | 2.85±1.93                                                                           | 5.15±1.47                                                                           |
| b*           | 17.8±9.09                                                                           | 24.89±2.39                                                                          | 10.24±4.33                                                                          | 26.13±2.69                                                                          |
| Color        |  |  |  |  |

243

244

*Satsuma*-Capsicum leaves were gathered, and three leaves and fruits each from the top and bottom of the plant were collected from four trees per strain. CIE L\*a\*b\* color space values: L\*, lightness; a\*, green-red; b\*, blue-yellow.

245

**Table 2.** Leaf characteristics during the growth period of the *Satsuma*-Tabasco pepper.

| Collection # | 1                                                                                 |                                                                                   | 2                                                                                 |                                                                                   | 3                                                                                   |                                                                                     | 4                                                                                   |                                                                                     | 5                                                                                   |                                                                                     |
|--------------|-----------------------------------------------------------------------------------|-----------------------------------------------------------------------------------|-----------------------------------------------------------------------------------|-----------------------------------------------------------------------------------|-------------------------------------------------------------------------------------|-------------------------------------------------------------------------------------|-------------------------------------------------------------------------------------|-------------------------------------------------------------------------------------|-------------------------------------------------------------------------------------|-------------------------------------------------------------------------------------|
| Date         | 7/15/2017                                                                         |                                                                                   | 7/22/2017                                                                         |                                                                                   | 7/29/2017                                                                           |                                                                                     | 8/5/2017                                                                            |                                                                                     | 8/10/2017                                                                           |                                                                                     |
| Position     | Top                                                                               | Bottom                                                                            | Top                                                                               | Bottom                                                                            | Top                                                                                 | Bottom                                                                              | Top                                                                                 | Bottom                                                                              | Top                                                                                 | Bottom                                                                              |
| Length (cm)  | 5.9                                                                               | 7.8                                                                               | 7.5                                                                               | 9.1                                                                               | 6.5                                                                                 | 9.4                                                                                 | 8.1                                                                                 | 9.2                                                                                 | 7.0                                                                                 | 9.4                                                                                 |
| Width (cm)   | 3.1                                                                               | 4.2                                                                               | 3.2                                                                               | 4.8                                                                               | 3.0                                                                                 | 4.9                                                                                 | 3.8                                                                                 | 4.5                                                                                 | 3.1                                                                                 | 4.9                                                                                 |
| Weight (g)   | 0.261                                                                             | 0.444                                                                             | 0.29                                                                              | 0.68                                                                              | 0.208                                                                               | 0.782                                                                               | 0.402                                                                               | 0.363                                                                               | 0.268                                                                               | 0.838                                                                               |
| L*           | 45.37±4.34                                                                        | 45.69±2.45                                                                        | 43.8±2.07                                                                         | 41.68±1.38                                                                        | 36.52±1.17                                                                          | 34.24±1.12                                                                          | 35.52±0.87                                                                          | 34.05±0.60                                                                          | 41.72±1.69                                                                          | 39.41±1.77                                                                          |
| a*           | -8.79±0.66                                                                        | -9.92±0.34                                                                        | -9.32±0.30                                                                        | -9.13±0.24                                                                        | -7.2±0.31                                                                           | -7.21±0.41                                                                          | -7.58±0.10                                                                          | -7.79±0.43                                                                          | -8.19±0.37                                                                          | -8.35±1.11                                                                          |
| b*           | 22.45 + 1.06                                                                      | 28.18±2.71                                                                        | 22.14 + 1.69                                                                      | 21.58±0.86                                                                        | 18.83 + 0.91                                                                        | 17.4±1.37                                                                           | 19.13 + 0.62                                                                        | 17.2±1.59                                                                           | 20.34 + 1.64                                                                        | 18.09±2.25                                                                          |
| Color        |  |  |  |  |  |  |  |  |  |  |

246

| Collection # | 6                                                                                   |                                                                                     | 7                                                                                   |                                                                                     | 8                                                                                     |                                                                                       | 9                                                                                     |                                                                                       | 10                                                                                    |                                                                                       |
|--------------|-------------------------------------------------------------------------------------|-------------------------------------------------------------------------------------|-------------------------------------------------------------------------------------|-------------------------------------------------------------------------------------|---------------------------------------------------------------------------------------|---------------------------------------------------------------------------------------|---------------------------------------------------------------------------------------|---------------------------------------------------------------------------------------|---------------------------------------------------------------------------------------|---------------------------------------------------------------------------------------|
| Date         | 8/12/2017                                                                           |                                                                                     | 8/17/2017                                                                           |                                                                                     | 8/19/2017                                                                             |                                                                                       | 8/23/2017                                                                             |                                                                                       | 8/26/2017                                                                             |                                                                                       |
| Position     | Top                                                                                 | Bottom                                                                              | Top                                                                                 | Bottom                                                                              | Top                                                                                   | Bottom                                                                                | Top                                                                                   | Bottom                                                                                | Top                                                                                   | Bottom                                                                                |
| Length (cm)  | 6.2                                                                                 | 9.6                                                                                 | 7.5                                                                                 | 9.1                                                                                 | 5.8                                                                                   | 12.1                                                                                  | 5.5                                                                                   | 13.7                                                                                  | 4.5                                                                                   | 11.5                                                                                  |
| Width (cm)   | 2.7                                                                                 | 4.2                                                                                 | 3.2                                                                                 | 4.8                                                                                 | 3.1                                                                                   | 5.6                                                                                   | 3.0                                                                                   | 6.4                                                                                   | 2.3                                                                                   | 5.5                                                                                   |
| Weight (g)   | 0.213                                                                               | 0.658                                                                               | 0.290                                                                               | 0.680                                                                               | 0.200                                                                                 | 1.026                                                                                 | 0.184                                                                                 | 1.418                                                                                 | 0.114                                                                                 | 0.962                                                                                 |
| L*           | 34.45±1.79                                                                          | 31.84±0.88                                                                          | 43.8±2.07                                                                           | 41.68±1.38                                                                          | 35.92±1.30                                                                            | 33.48±0.71                                                                            | 35.60±2.41                                                                            | 32.13±1.78                                                                            | 45.23±2.49                                                                            | 41.79±0.77                                                                            |
| a*           | -6.63±0.16                                                                          | -7.44±0.35                                                                          | -9.32±0.30                                                                          | -9.13±0.24                                                                          | -7.69±0.20                                                                            | -7.18±0.29                                                                            | -6.90±0.23                                                                            | -7.20±0.42                                                                            | -9.58±0.46                                                                            | -9.19±0.13                                                                            |
| b*           | 17.48 + 1.04                                                                        | 14.64±1.88                                                                          | 22.14 + 1.69                                                                        | 21.58±0.86                                                                          | 21.87±1.45                                                                            | 17.85±1.53                                                                            | 20.43±1.74                                                                            | 14.98±2.60                                                                            | 26.20±1.63                                                                            | 22.24±0.64                                                                            |
| Color        |  |  |  |  |  |  |  |  |  |  |

247

| Collection # | 11        |        | 12       |        | 13       |        | 14        |        | 15        |        |
|--------------|-----------|--------|----------|--------|----------|--------|-----------|--------|-----------|--------|
| Date         | 8/30/2017 |        | 9/2/2017 |        | 9/6/2017 |        | 9/13/2017 |        | 9/16/2017 |        |
| Position     | Top       | Bottom | Top      | Bottom | Top      | Bottom | Top       | Bottom | Top       | Bottom |
| Length (cm)  | 5.3       | 13.6   | 4.8      | 13.6   | 4.7      | 13.9   | 5.4       | 12.5   | 4.5       | 15.2   |
| Width (cm)   | 2.5       | 6.1    | 2.5      | 6.0    | 2.3      | 5.8    | 2.5       | 5.8    | 2.1       | 6.7    |

|            |                                                                                   |                                                                                   |                                                                                   |                                                                                   |                                                                                     |                                                                                     |                                                                                     |                                                                                     |                                                                                     |                                                                                     |
|------------|-----------------------------------------------------------------------------------|-----------------------------------------------------------------------------------|-----------------------------------------------------------------------------------|-----------------------------------------------------------------------------------|-------------------------------------------------------------------------------------|-------------------------------------------------------------------------------------|-------------------------------------------------------------------------------------|-------------------------------------------------------------------------------------|-------------------------------------------------------------------------------------|-------------------------------------------------------------------------------------|
| Weight (g) | 0.139                                                                             | 1.272                                                                             | 0.124                                                                             | 1.176                                                                             | 0.111                                                                               | 1.405                                                                               | 0.133                                                                               | 1.218                                                                               | 0.133                                                                               | 1.566                                                                               |
| L*         | 36.07±1.41                                                                        | 34.18±1.13                                                                        | 38.07±1.57                                                                        | 35.05±1.14                                                                        | 36.97±1.38                                                                          | 33.05±0.66                                                                          | 36.74±1.70                                                                          | 35.90±0.75                                                                          | 37.88±2.91                                                                          | 37.60±2.28                                                                          |
| a*         | -7.37±0.24                                                                        | -8.23±0.35                                                                        | -7.50±0.31                                                                        | -8.58±0.27                                                                        | -8.14±0.24                                                                          | -7.33±0.18                                                                          | -8.73±0.20                                                                          | -8.63±0.25                                                                          | -7.84±1.96                                                                          | -9.13±0.30                                                                          |
| b*         | 23.05±1.40                                                                        | 18.75±1.89                                                                        | 22.73±1.33                                                                        | 19.98±1.60                                                                        | 21.40±1.71                                                                          | 15.33±0.71                                                                          | 22.69±1.24                                                                          | 20.2±1.24                                                                           | 20.74±2.13                                                                          | 22.33±2.80                                                                          |
| Color      |  |  |  |  |  |  |  |  |  |  |

248

|              |                                                                                   |                                                                                   |                                                                                   |                                                                                   |                                                                                     |                                                                                     |                                                                                     |                                                                                     |                                                                                     |                                                                                     |
|--------------|-----------------------------------------------------------------------------------|-----------------------------------------------------------------------------------|-----------------------------------------------------------------------------------|-----------------------------------------------------------------------------------|-------------------------------------------------------------------------------------|-------------------------------------------------------------------------------------|-------------------------------------------------------------------------------------|-------------------------------------------------------------------------------------|-------------------------------------------------------------------------------------|-------------------------------------------------------------------------------------|
| Collection # | 16                                                                                |                                                                                   | 17                                                                                |                                                                                   | 18                                                                                  |                                                                                     | 19                                                                                  |                                                                                     | 20                                                                                  |                                                                                     |
| Date         | 9/23/2017                                                                         |                                                                                   | 9/30/2017                                                                         |                                                                                   | 10/7/2017                                                                           |                                                                                     | 10/14/2017                                                                          |                                                                                     | 10/21/2017                                                                          |                                                                                     |
| Position     | Top                                                                               | Bottom                                                                            | Top                                                                               | Bottom                                                                            | Top                                                                                 | Bottom                                                                              | Top                                                                                 | Bottom                                                                              | Top                                                                                 | Bottom                                                                              |
| Length (cm)  | 4.9                                                                               | 12.1                                                                              | 4.6                                                                               | 12.7                                                                              | 4.7                                                                                 | 11.5                                                                                | 4.1                                                                                 | 13.6                                                                                | 5.3                                                                                 | 11.5                                                                                |
| Width (cm)   | 2.4                                                                               | 5.9                                                                               | 2.4                                                                               | 6                                                                                 | 2.5                                                                                 | 5.6                                                                                 | 2.3                                                                                 | 6.0                                                                                 | 2.5                                                                                 | 5.0                                                                                 |
| Weight (g)   | 0.107                                                                             | 1.317                                                                             | 0.124                                                                             | 1.213                                                                             | 0.142                                                                               | 0.948                                                                               | 0.103                                                                               | 1.348                                                                               | 0.192                                                                               | 0.504                                                                               |
| L*           | 35.02±3.30                                                                        | 36.40±0.42                                                                        | 34.73±1.27                                                                        | 39.63±0.78                                                                        | 34.53±1.79                                                                          | 40.18±1.85                                                                          | 36.99±0.55                                                                          | 41.55±2.37                                                                          | 32.92±1.80                                                                          | 33.35±0.17                                                                          |
| a*           | -7.98±0.94                                                                        | -8.95±0.05                                                                        | -7.37±0.36                                                                        | -9.00±0.37                                                                        | -7.32±0.53                                                                          | -9.20±0.26                                                                          | -7.77±0.13                                                                          | -8.55±0.51                                                                          | -6.80±0.59                                                                          | -8.00±0.15                                                                          |
| b*           | 19.2±3.66                                                                         | 21.08±0.57                                                                        | 19.27±0.93                                                                        | 24.28±2.70                                                                        | 16.44±2.14                                                                          | 24.98±2.56                                                                          | 18.59±0.64                                                                          | 26.68±3.33                                                                          | 13.80±2.15                                                                          | 15.58±0.29                                                                          |
| Color        |  |  |  |  |  |  |  |  |  |  |

249

|              |            |            |            |            |            |            |            |            |            |            |
|--------------|------------|------------|------------|------------|------------|------------|------------|------------|------------|------------|
| Collection # | 21         |            | 22         |            | 23         |            | 24         |            | 25         |            |
| Date         | 10/30/2017 |            | 11/4/2017  |            | 11/9/2017  |            | 11/15/2017 |            | 11/18/2017 |            |
| Position     | Top        | Bottom     | Top        | Bottom     | Top        | Bottom     | Top        | Bottom     | Top        | Bottom     |
| Length (cm)  | 4.5        | 11.2       | 5.1        | 10.1       | 5.4        | 11.2       | 4.0        | 10.1       | 4.6        | 10.3       |
| Width (cm)   | 2.4        | 5.7        | 2.7        | 5.6        | 2.6        | 5.3        | 2.2        | 4.5        | 2.6        | 5.1        |
| Weight (g)   | 0.144      | 0.926      | 0.213      | 0.749      | 0.179      | 0.850      | 0.149      | 0.571      | 0.189      | 0.786      |
| L*           | 35.37±5.35 | 33.72±1.66 | 38.84±0.93 | 41.84±3.9  | 38.48±0.68 | 48.14±1.45 | 31.47±0.76 | 34.90±2.76 | 34.65±1.38 | 38.37±3.26 |
| a*           | -6.59±1.01 | -7.87±0.38 | -6.83±0.71 | -8.55±0.74 | -6.87±0.25 | -9.50±0.74 | -5.04±0.10 | -7.54±0.83 | -5.39±0.65 | -8.23±0.42 |
| b*           | 18.60±8.91 | 16.42±1.82 | 13.98±1.72 | 18.08±4.32 | 13.93±0.88 | 29.45±2.38 | 12.43±0.71 | 17.88±4.77 | 15.97±1.95 | 23.00±4.78 |

250

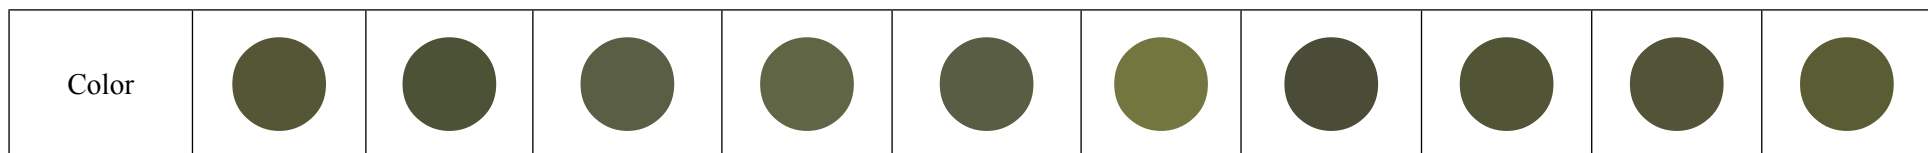

| Collection # | 26                                                                                |                                                                                   | 27                                                                                |                                                                                   | 28                                                                                  |                                                                                     | 29                                                                                  |                                                                                     | 30                                                                                  |                                                                                     |
|--------------|-----------------------------------------------------------------------------------|-----------------------------------------------------------------------------------|-----------------------------------------------------------------------------------|-----------------------------------------------------------------------------------|-------------------------------------------------------------------------------------|-------------------------------------------------------------------------------------|-------------------------------------------------------------------------------------|-------------------------------------------------------------------------------------|-------------------------------------------------------------------------------------|-------------------------------------------------------------------------------------|
| Date         | 11/25/2017                                                                        |                                                                                   | 12/2/2017                                                                         |                                                                                   | 12/6/2017                                                                           |                                                                                     | 12/9/2017                                                                           |                                                                                     | 12/13/2017                                                                          |                                                                                     |
| Position     | Top                                                                               | Bottom                                                                            | Top                                                                               | Bottom                                                                            | Top                                                                                 | Bottom                                                                              | Top                                                                                 | Bottom                                                                              | Top                                                                                 | Bottom                                                                              |
| Length (cm)  | 4.3                                                                               | 10.3                                                                              | 5.4                                                                               | 10.4                                                                              | 5.4                                                                                 | 11.2                                                                                | 4.7                                                                                 | 12.0                                                                                | 5.0                                                                                 | 8.5                                                                                 |
| Width (cm)   | 2.5                                                                               | 5.0                                                                               | 3.1                                                                               | 5.3                                                                               | 2.6                                                                                 | 5.3                                                                                 | 2.5                                                                                 | 6.0                                                                                 | 2.4                                                                                 | 4.3                                                                                 |
| Weight (g)   | 0.167                                                                             | 0.626                                                                             | 0.206                                                                             | 0.681                                                                             | 0.179                                                                               | 0.850                                                                               | 0.169                                                                               | 0.957                                                                               | 0.175                                                                               | 0.494                                                                               |
| L*           | 32.73±1.62                                                                        | 33.34±3.3                                                                         | 34.65±1.90                                                                        | 37.19±3.22                                                                        | 38.48±0.68                                                                          | 48.14±1.45                                                                          | 35.84±1.05                                                                          | 42.28±2.43                                                                          | 34.64±2.20                                                                          | 42.63±3.68                                                                          |
| a*           | -5.04±0.62                                                                        | -7.17±0.84                                                                        | -5.90±0.59                                                                        | -6.92±1.19                                                                        | -6.87±0.25                                                                          | -9.50±0.74                                                                          | -4.95±0.47                                                                          | -5.94±2.83                                                                          | -4.60±1.26                                                                          | -4.77±0.67                                                                          |
| b*           | 14.17±3.17                                                                        | 15.00±4.48                                                                        | 17.33±2.71                                                                        | 21.42±4.80                                                                        | 13.93±0.88                                                                          | 29.45±2.38                                                                          | 19.04±1.37                                                                          | 28.30±4.40                                                                          | 16.52±3.92                                                                          | 29.87±5.39                                                                          |
| Color        |  |  |  |  |  |  |  |  |  |  |

251

| Collection # | 31                                                                                  |                                                                                     | 32                                                                                  |                                                                                     |
|--------------|-------------------------------------------------------------------------------------|-------------------------------------------------------------------------------------|-------------------------------------------------------------------------------------|-------------------------------------------------------------------------------------|
| Date         | 12/20/2017                                                                          |                                                                                     | 12/23/2017                                                                          |                                                                                     |
| Position     | Top                                                                                 | Bottom                                                                              | Top                                                                                 | Bottom                                                                              |
| Length (cm)  | 4.9                                                                                 | 7.0                                                                                 | 4.7                                                                                 | 5.3                                                                                 |
| Width (cm)   | 3.0                                                                                 | 3.7                                                                                 | 2.3                                                                                 | 2.5                                                                                 |
| Weight (g)   | 0.181                                                                               | 0.083                                                                               | 0.106                                                                               | 0.080                                                                               |
| L*           | 35.3±2.76                                                                           | 33.53±3.23                                                                          | 32.43±1.94                                                                          | 31.5±4.77                                                                           |
| a*           | -2.27±1.75                                                                          | -2.48±3.10                                                                          | -1.64±2.19                                                                          | -2.40±1.79                                                                          |
| b*           | 15.7±3.63                                                                           | 15.75±3.09                                                                          | 12.99±3.09                                                                          | 14.15±4.62                                                                          |
| Color        |  |  |  |  |

252

*Satsuma*-Capsicum leaves were gathered, and three leaves and fruits each from the top and bottom of the plant were collected from four trees per strain. CIE L\*a\*b\*

253

color space values: L\*, lightness; a\*, green-red; b\*, blue-yellow.

254 **Figure 3.** Changes over time in the concentration of capsaicin and dihydrocapsaicin in (A)  
255 *Satsuma*-Habanero orange and (B) *Satsuma*-Tabasco pepper fruits. Solid black line, capsaicin; black  
256 dotted-line, dihydrocapsaicin; solid red line, total capsaicin and dihydrocapsaicin contents.

257

258 All *Satsuma*-Capsicum plants induced antioxidative activity *in vitro* (Figure 4A). The antioxidative  
259 capacity of *Satsuma*-Habanero orange was significantly higher than that of tropical-origin Habanero orange  
260 in the s/p, but not in the pericarps. In contrast, antioxidative activity was significantly higher in the pericarp  
261 of Habanero red and Indonesian-origin peppers than that in the s/p. There was no correlation between  
262 antioxidant activity and pungent compound contents ( $R^2 = 0.4579$ ). Capsicum consists of many functional  
263 components such as carotenoid pigments, capsanthin, and  $\alpha$ -tocopherol, in addition to the pungent  
264 ingredients. Thus, we concluded that the antioxidant properties might be due to interactions between the  
265 liposoluble carotenoid pigments capsanthin and  $\alpha$ -tocopherol, rather than due to the pungent components  
266 [21,22].

267

268 **Figure 4.** (A) Antioxidative activity and (B) the level of nitric oxide (NO) production in vascular  
269 endothelial cells for *Satsuma*-Capsicum and tropical-origin peppers. Peri, pericarps; s/p, seeds and placentas.  
270 \* $P < 0.05$  versus pericarps

271

272 We further investigated whether *Satsuma*-Capsicum would promote NO production in VECs at levels  
273 similar to those of tropical-origin peppers to confirm their bioregulatory effect on vascular function. Our  
274 results indicated that all peppers could potentially increase NO production, but there was no significant  
275 difference between pericarps and s/p. Additionally, these data also showed that the effects of  
276 *Satsuma*-Capsicum extracts on NO production were similar to the effects of the tropical-origin pepper  
277 extracts (Figure 4B).

278

## 279 **Conclusions**

280 All *Satsuma*-Capsicum plants cultivated under adverse conditions in Southern Japan showed higher  
281 antioxidative activity than the traditionally grown tropical peppers. Therefore, *Satsuma*-Capsicum extracts



282 from peppers cultivated in harsh environments within Southern Japan showed similar effects on NO  
283 production to those of tropical-origin pepper extracts; thus, *Satsuma-Capsicum* can potentially improve  
284 vascular endothelial function. We also concluded that *Capsicum* cultivated under these adverse conditions  
285 contained higher levels of capsaicinoids than those cultivated in tropical regions. Moreover,  
286 *Satsuma-Capsicum* plants cultivated in nutrient-poor sandy soil contained higher concentrations of pungent  
287 components than traditional tropical-origin peppers. Finally, the *Satsuma-Capsicum* plants cultivated in this  
288 study were slower to spoil than traditional tropical-origin peppers and could be harvested over a longer  
289 period of time.

290 Capsaicin and dihydrocapsaicin are pungent components within peppers. The continuous consumption of  
291 capsaicin has been found to promote fat reduction in humans [23,24], the induction of skeletal muscle  
292 hypertrophy [25], and has shown potential for reducing obesity [26,27]. These effects could be the result of  
293 activity by capsaicin, a vanilloid belonging to the vanillyl group. Capsaicin potentially stimulates the  
294 transient receptor potential cation channel subfamily V member 1 (TRPV1), a receptor activation channel, by  
295 binding to vanilloid receptors; this could promote lipolysis and generate heat [28-31].

296 Other varieties of pepper and paprika are also widely considered to promote health, as they exhibit high  
297 antioxidant activity and also possess properties shown to limit the proliferation of cancer cells [32-34].  
298 Because paprika contains only trace amounts of capsaicin and dihydrocapsaicin, these properties were  
299 thought to result from the activity of capsanthin or carotenoid pigments. Moreover, peppers have been  
300 reported to contain polyphenols with various biomodulation functions [35-37]. The *Satsuma-Capsicum*  
301 plants investigated in this study showed significant antioxidative activity, which may have resulted from  
302 polyphenols, as there was no correlation between antioxidant activity and the concentration of pigment ( $R^2 =$   
303 0.4579).

304 Our results indicated that *Satsuma-Capsicum* plants are superior to traditional tropical-origin peppers, and  
305 thus show greater value for future product development.

306

## 307 **Acknowledgements**

308 The authors would like to thank Dr. Fumio Yagi for advice with the experiments and thank Dr. Jun-Ichi  
309 Sakagami and Mr. Kenta Komori for providing *Capsicum* samples.

## 310 **References**

311

- 312 [1] Monforte-González M, Guzmán-Antonio A, Uuh-Chim F, Vázquez-Flota F. Capsaicin accumulation is  
313 related to nitrate content in placentas of habanero peppers (*Capsicum chinense* Jacq.). *J Sci Food Agric.*  
314 2010;90(5):764-8. doi: 10.1002/jsfa.3880.
- 315 [2] Zhang ZX, Zhao SN, Liu GF, Huang ZM, Cao ZM, Cheng SH, et al. Discovery of putative capsaicin  
316 biosynthetic genes by RNA-Seq and digital gene expression analysis of pepper. *Sci Rep.*  
317 2016;6(34121):1-14. doi: 10.1038/srep34121.
- 318 [3] Kosuge S, Furuta M. Studies on the pungent principle of capsicum. *Agric Biol Chem.* 1970;34:248-56.  
319 doi: 10.1271/bbb1961.34.248.
- 320 [4] Othman ZAA, Ahmed YBH, Habila MA, Ghafar AA. Determination of capsaicin and dihydrocapsaicin  
321 in capsicum fruit samples using high performance liquid chromatography. *Molecules.* 2011;16:8919-29.  
322 doi: 10.3390/molecules16108919.
- 323 [5] Reyes-Escogido MDL, Gonzalez-Mondragon EG, Vazquez-Tzompantzi E. Chemical and  
324 pharmacological aspects of capsaicin. *Molecules.* 2011;16:1253-70. doi: 10.3390/molecules16021253.
- 325 [6] Ng CM, Reuter WM. Analysis of capsaicin and dihydrocapsaicin in chili peppers using the PerkinElmer  
326 altus HPLC system with PDA detection. *PerkinElmer Food and Nutrition Compendium* 2015;67-71.
- 327 [7] Song W, Derito CM, Liu MK, He X, Dong M, Liu RH. Cellular antioxidant activity of common  
328 vegetables. *J Agric Food Chem.* 2010;58(11):6621-9. doi: 10.1021/jf9035832.
- 329 [8] Chularojmontri L, Suwatronnakorn M, Wattanapitayakul SK. Influence of capsicum extract and capsaicin  
330 on endothelial health. *J Med Assoc Thai.* 2010;93(2):S92-101.
- 331 [9] McCarty MF, DiNicolantonio JJ, O'Keefe JH. Capsaicin may have important potential for promoting  
332 vascular and metabolic health. *Open Heart.* 2015;2(1):e000262. doi: 10.1136/openhrt-2015-000262.
- 333 [10] Kuroda R, Kazumura K, Ushikata M, Minami Y, Kajiya K. Elucidating the improvement in vascular  
334 endothelial function of Sakurajima Daikon and its mechanism of action: a comparative study with  
335 *Raphanus sativus*. *J Agric Food Chem.* 2018;66(33):8714-21. doi: 10.1021/acs.jafc.8b01750.
- 336 [11] Ansari AQ, Ahmed SA, Waheed MA, Juned S. Extraction and determination of antioxidant activity of  
337 *Withania somnifera* Dunal. *Euro J Exp Bio.* 2013;3(5):502-7.

- 338 [12] Garcia EJ, Oldoni TLC, Alencar SMD, Reis A, Loguercio AD, Grande RHM. Antioxidant activity by  
339 DPPH assay of potential solutions to be applied on bleached teeth. *Braz Dent J.* 2012;23(1):22-7. doi:  
340 10.1590/S0103-64402012000100004.
- 341 [13] Kedare SB, Singh RP. Genesis and development of DPPH method of antioxidant assay. *J Food Sci*  
342 *Technol.* 2011;48(4):412-22. doi: 10.1007/s13197-011-0251-1.
- 343 [14] Bryan NS, Grisham MB. Methods to detect nitric oxide and its metabolites in biological samples. *Free*  
344 *Radic Biol Med.* 2007;43(5):645-57. doi: 10.1016/j.freeradbiomed.2007.04.026.
- 345 [15] Schulz K, Kerber S, Kelm M. Reevaluation of the Griess method for determining NO/NO<sub>2</sub><sup>-</sup> in aqueous  
346 and protein-containing samples. *Nitric Oxide* 1999;3(3):225-34. doi: 10.1006/niox.1999.0226.
- 347 [16] Tsikas D. Analysis of nitrite and nitrate in biological fluids by assays based on the Griess reaction:  
348 Appraisal of the Griess reaction in the L-arginine/nitric oxide area of research. *J Chromatogr B.*  
349 2007;851:51-70. doi: 10.1016/j.jchromb.2006.07.054.
- 350 [17] Hu TM, Chiu SJ, Hsu YM. Nitroxidative chemistry interferes with fluorescent probe chemistry:  
351 implications for nitric oxide detection using 2,3-diaminonaphthalene. *Biochem Biophys Res Commun.*  
352 2014;451:96-201. doi: 10.1016/j.bbrc.2014.07.097.
- 353 [18] Canto-Flick A, Balam-Uc E, Bello-Bello JJ, Lecona-Guzmán C, Solís-Marroquín D, Avilés-Viñas S, et  
354 al. Capsaicinoids content in habanero pepper (*Capsicum chinense* Jacq.): hottest known cultivars.  
355 *HortScience.* 2018;43(5):1344-9.
- 356 [19] Pandhair V, Sharma S. Accumulation of capsaicin in seed, pericarp and placenta of *Capsicum annuum* L  
357 fruit. *J Plant Biochem Biotechnol.* 2008;17(1):23-7. doi: 10.1007/BF03263255.
- 358 [20] Taira S, Shimma S, Osaka I, Kaneko D, Ichiyanagi Y, Ikeda R, et al. Mass spectrometry imaging of the  
359 capsaicin localization in the capsicum fruits. *J Biotechnol Wellness Ind.* 2012;1:61-5. doi:  
360 10.6000/1927-3037.2012.01.01.04.
- 361 [21] Sun T, Xu Z, Wu CT, Janes M, Prinyawiwatkul W, No HK. Antioxidant activities of different colored  
362 sweet bell peppers (*Capsicum annuum* L.). *J Food Sci.* 2007;72(2):S98-102. doi:  
363 10.1111/j.1750-3841.2006.00245.x.
- 364 [22] Fernández-García E, Carvajal-Lérída I, Pérez-Gálvez A. Carotenoids exclusively synthesized in red  
365 pepper (capsanthin and capsorubin) protect human dermal fibroblasts against UVB induced DNA  
366 damage. *Photochem Photobiol Sci.* 2016;15(9):1204-11. doi: 10.1039/c6pp00134c.

- 367 [23] Arent SM, Walker AJ, Pellegrino JK, Sanders DJ, McFadden BA, Ziegenfuss TN, et al. The combined  
368 effects of exercise, diet, and a multi-ingredient dietary supplement on body composition and adipokine  
369 changes in overweight adults. *J Am Coll Nutr.* 2018;37(2):111-20. doi:  
370 10.1080/07315724.2017.1368039.
- 371 [24] Leung FW. Capsaicin as an anti-obesity drug. *Prog Drug Res.* 2014;68:171-9. doi:  
372 10.1007/978-3-0348-0828-6-7.
- 373 [25] Ito N, Ruegg UT, Kudo A, Miyagoe-Suzuki Y, Takeda SI. Capsaicin mimics mechanical load-induced  
374 intracellular signaling events: involvement of TRPV1-mediated calcium signaling in induction of  
375 skeletal muscle hypertrophy. *Channels.* 2013;7(3):221-4. doi: 10.4161/chan.24583.
- 376 [26] Almeida MA, Nadal JM, Grassioli S, Paludo KS, Zawadzki SF, Cruz L, et al. Enhanced gastric  
377 tolerability and improved anti-obesity effect of capsaicinoids-loaded PCL microparticles. *Mater Sci Eng*  
378 *C Mater Biol Appl.* 2014;40:345-56. doi: 10.1016/j.msec.2014.03.049.
- 379 [27] Mun JM, Ok HM, Kwon O. Corn gluten hydrolysate and capsaicin have complimentary actions on body  
380 weight reduction and lipid-related genes in diet-induced obese rats. *Nutr Res.* 2014;34(5):458-65. doi:  
381 10.1016/j.nutres.2014.04.009.
- 382 [28] Saito M. Capsaicin and related food ingredients reducing body fat through the activation of TRP and  
383 brown fat thermogenesis. *Adv Food Nutr Res.* 2015;76:1-28. doi: 10.1016/bs.afnr.2015.07.002.
- 384 [29] Saito M, Yoneshiro T. Capsinoids and related food ingredients activating brown fat thermogenesis and  
385 reducing body fat in humans. *Curr Opin Lipidol.* 2013;24(1):71-7. doi:  
386 10.1097/MOL.0b013e32835a4f40.
- 387 [30] Varghese S, Kubatka P, Rodrigo L, Gazdikova K, Caprnda M, Fedotova J, et al. Chili pepper as a body  
388 weight-loss food. *Int J Food Sci Nutr.* 2017;68(4):392-401. doi: 10.1080/09637486.2016.1258044.
- 389 [31] Wang Y, Cui L, Xu H, Liu S, Zhu F, Yan F, et al. TRPV1 agonism inhibits endothelial cell  
390 inflammation via activation of eNOS/NO pathway. *Atherosclerosis.* 2017;260:13-9. doi:  
391 10.1016/j.atherosclerosis.2017.03.016.
- 392 [32] Daood HG, Vinkler M, Markus F, Hebshi EA, Biacs PA. Antioxidant vitamin content of spice red  
393 pepper (paprika) as affected by technological and varietal factors. *Food Chem.* 1996;55(4):365-72. doi:  
394 10.1016/0308-8146(95)00136-0.
- 395 [33] Markus F, Daood HG, Kapitany J, Biacs PA. Change in the carotenoid and antioxidant content of spice

- 396 red pepper (paprika) as a function of ripening and some technological factors. J Agric Food Chem.  
397 1999;47(1):100-7. doi: 10.1021/jf980485z.
- 398 [34] Škrovánková S, Mlček J, Orsavová J, Juríková T, Dřimalová P. Polyphenols content and antioxidant  
399 activity of paprika and pepper spices. J Food Sci. 2017;11(1):52-7. doi: 10.5219/695.
- 400 [35] Materska M, Perucka I. Antioxidant activity of the main phenolic compounds isolated from hot pepper  
401 fruit (*Capsicum annuum* L.) J Agric Food Chem. 2005;53:1750-6. doi: 10.1021/jf035331k.
- 402 [36] Mokhtar M, Soukup J, Donato P, Cacciola F, Dugo P, Riazi A, et al. Determination of the polyphenolic  
403 content of a *Capsicum annuum* L. extract by liquid chromatography coupled to photodiode array and  
404 mass spectrometry detection and evaluation of its biological activity. J Sep Sci. 2015;38(2):171-8. doi:  
405 10.1002/jssc.201400993.
- 406 [37] Oboh G, Rocha JBT. Polyphenols in red pepper (*Capsicum annuum* var aviculare Tepin) and their  
407 protective effects on some pro-oxidant induced lipid peroxidation in brain and liver. Eur Food Res  
408 Technol. 2007;225(2):239-47. doi: 10.1007/s00217-006-0410-1.
- 409



**A**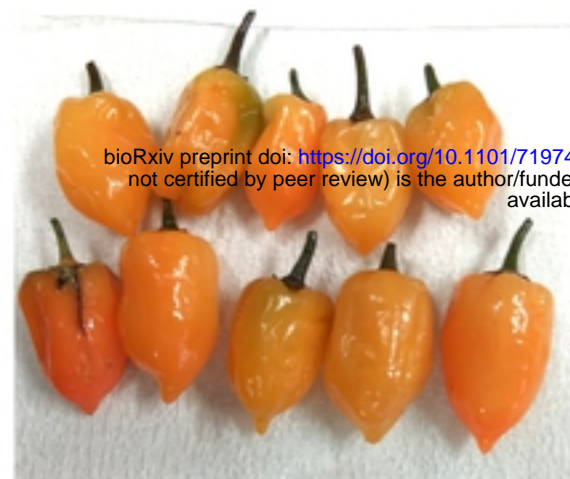

Habanero orange

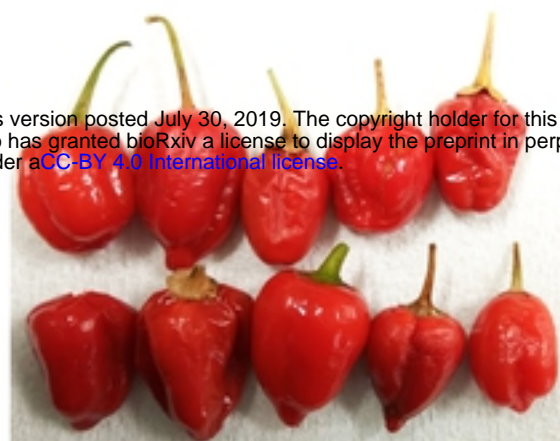

Habanero red

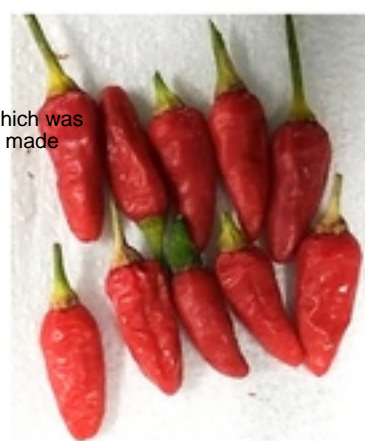

Indonesian origin

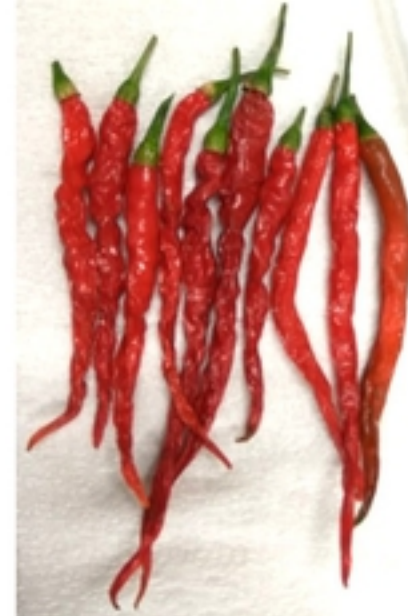

Laris

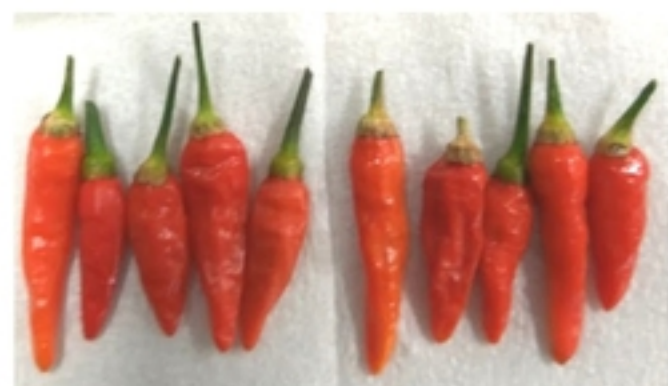

Taruna pepper

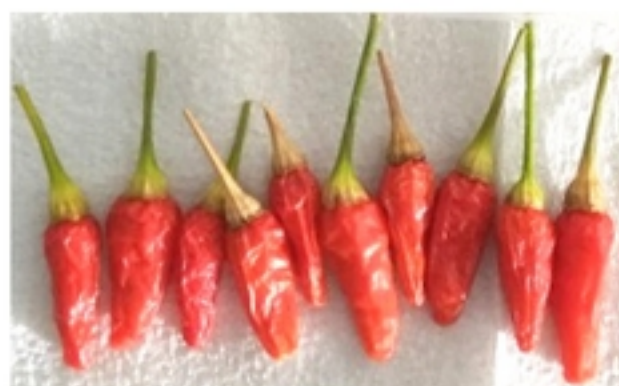

Okinawan chili pepper

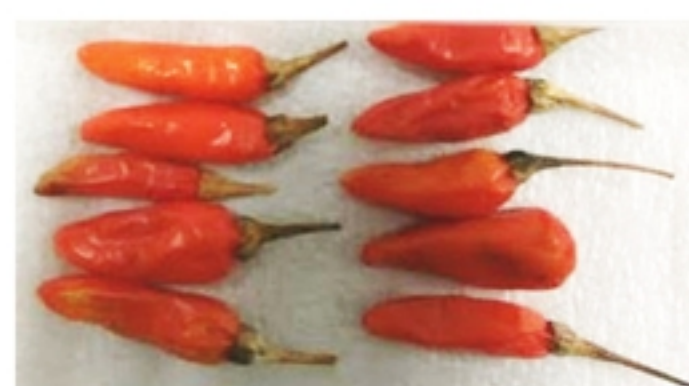

Tabasco pepper

bioRxiv preprint doi: <https://doi.org/10.1101/719740>; this version posted July 30, 2019. The copyright holder for this preprint (which was not certified by peer review) is the author/funder, who has granted bioRxiv a license to display the preprint in perpetuity. It is made available under aCC-BY 4.0 International license.

**B**

(i)

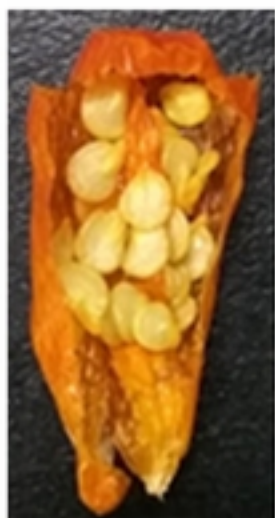

Cross section

(ii)

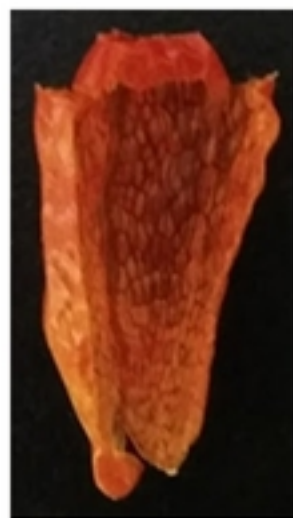

Pericarp

(iii)

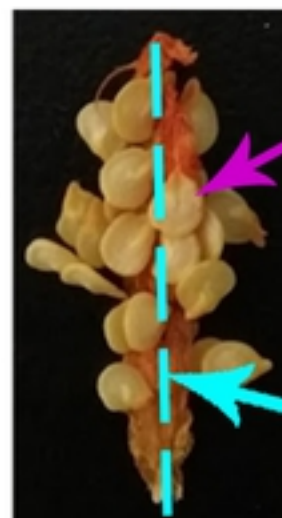

Seed

Placenta

Seed and placenta

Figure 1

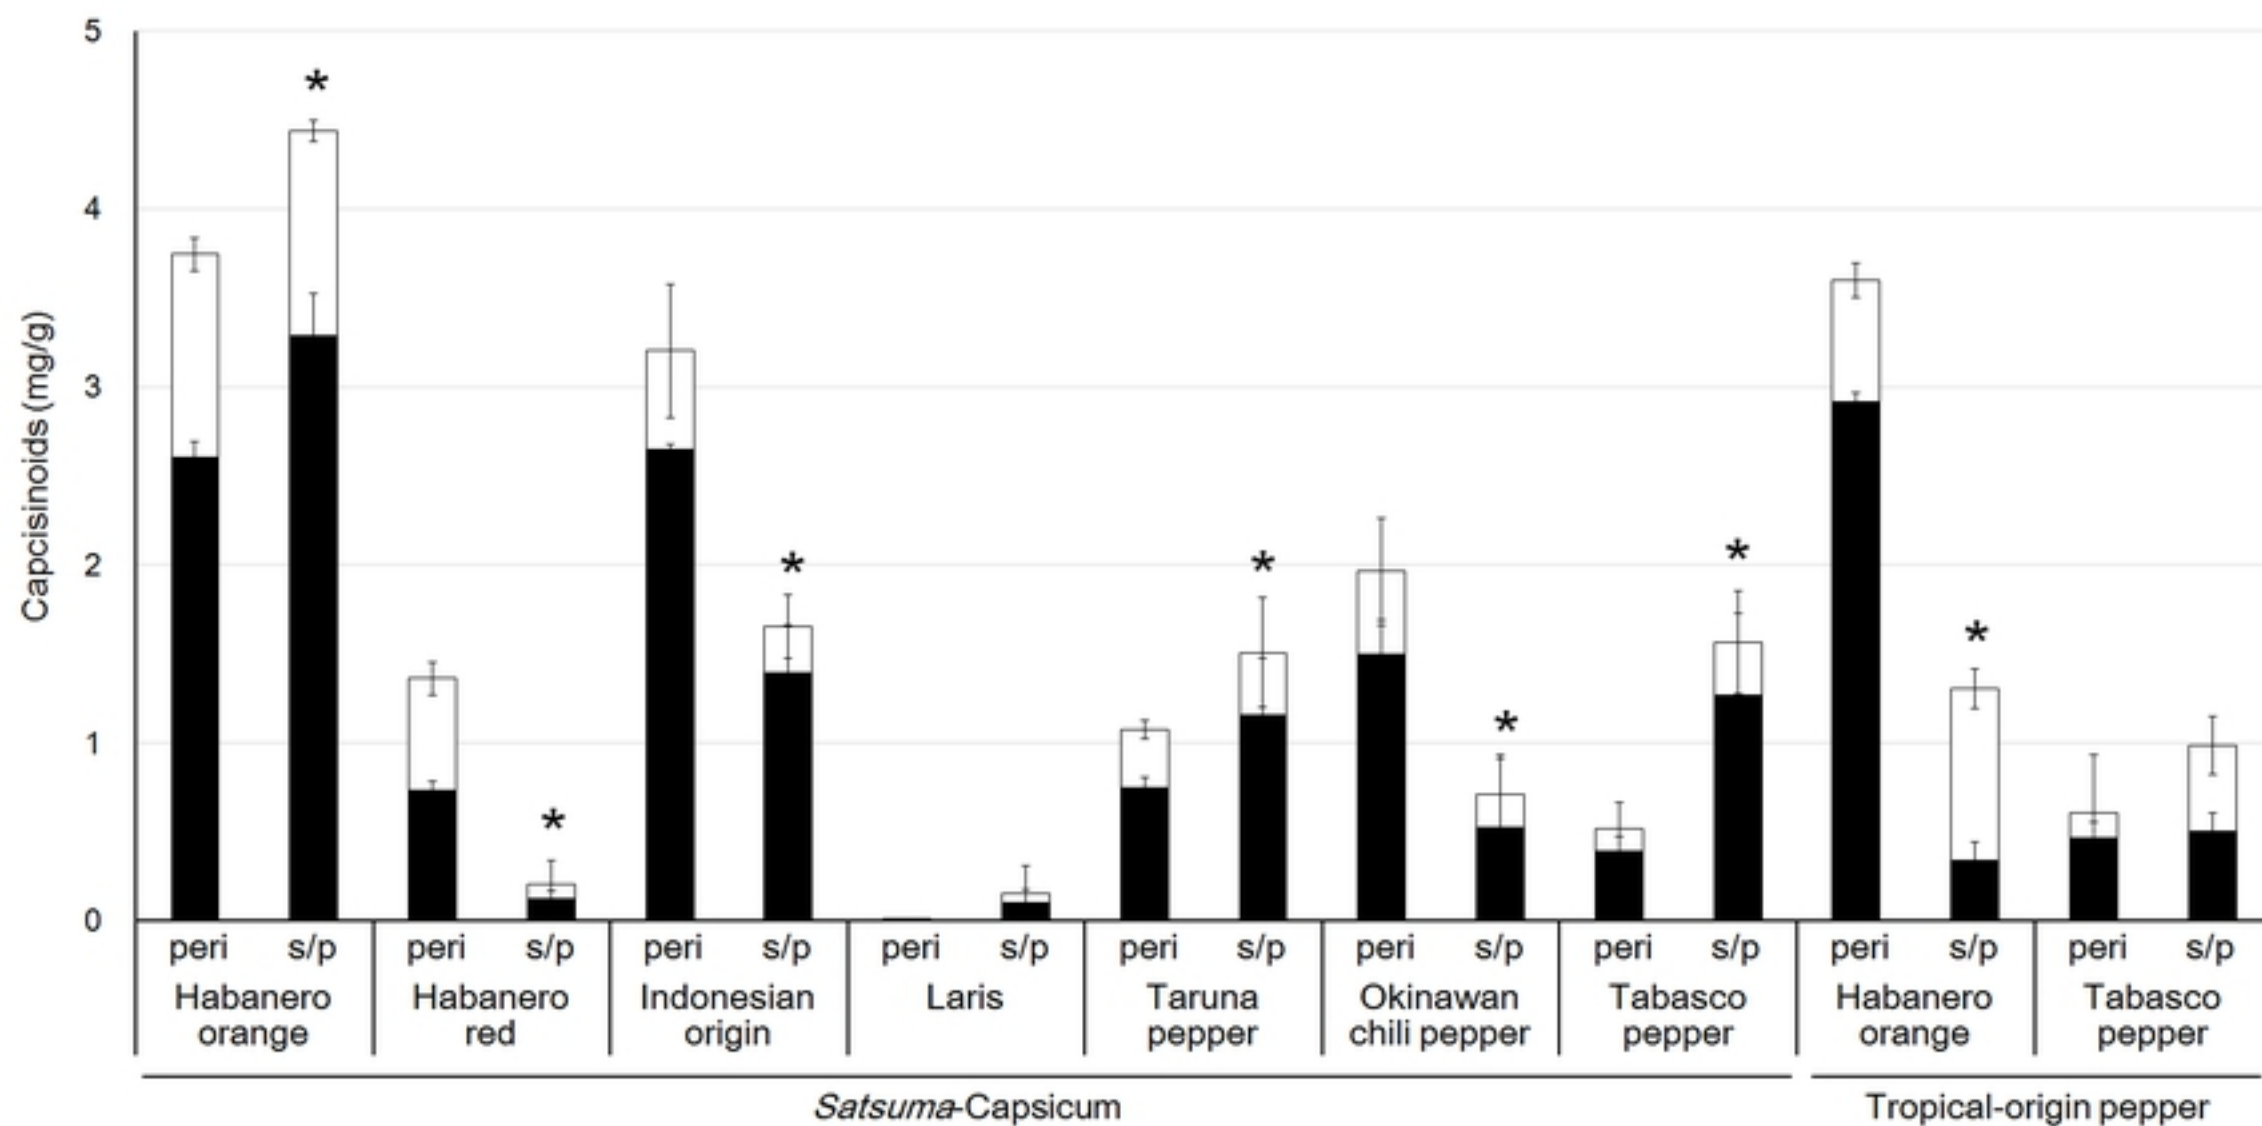

Figure2

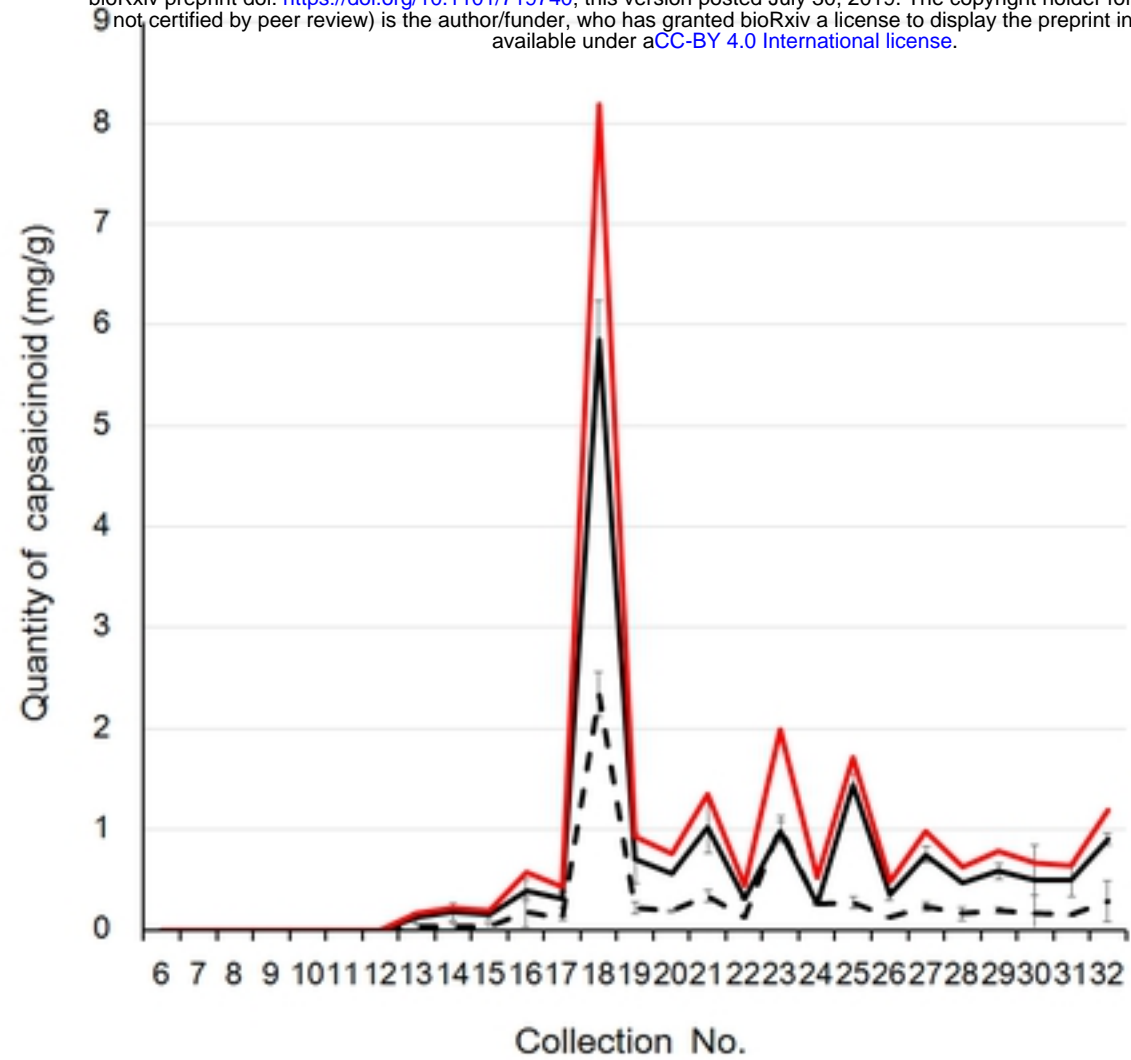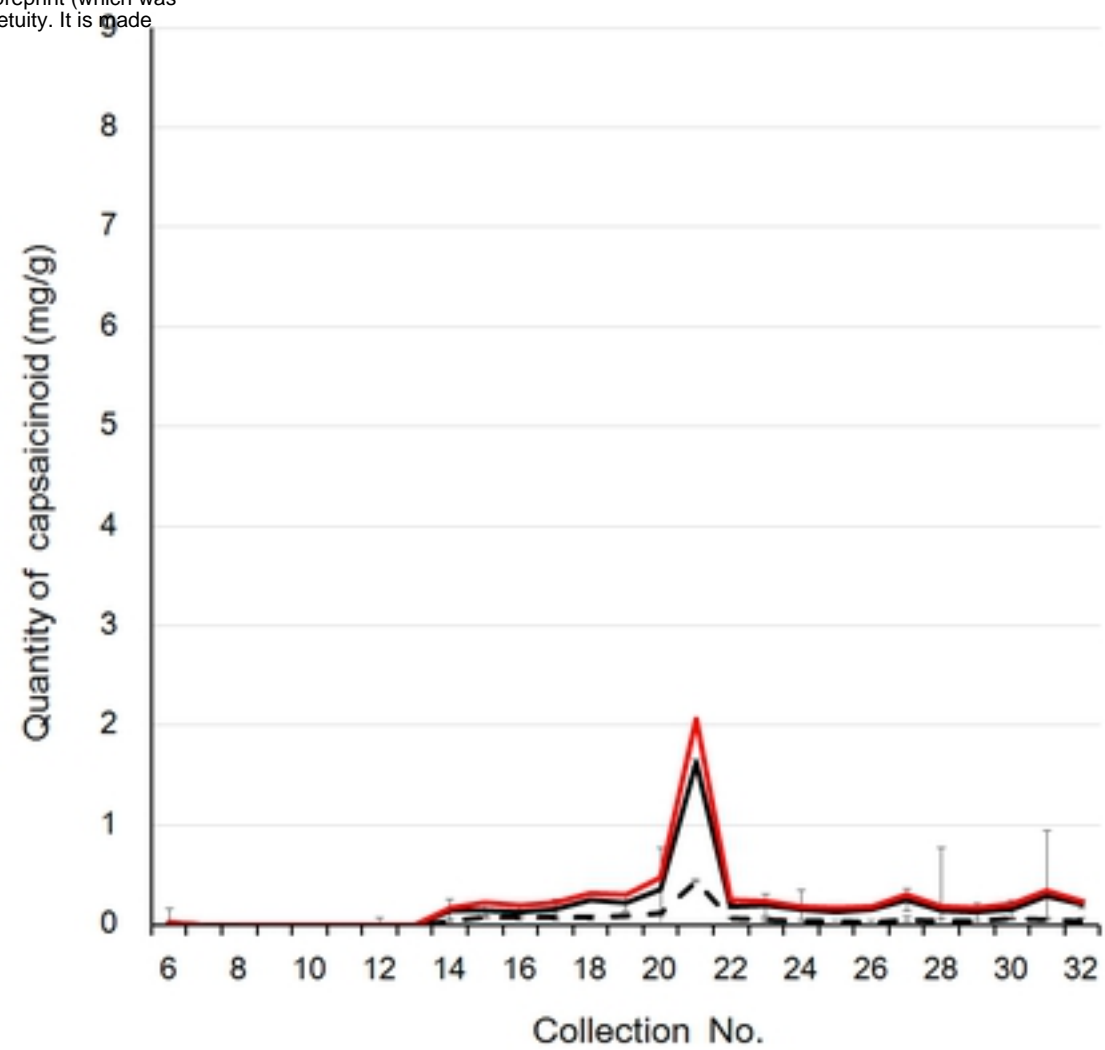

Figure3



A

bioRxiv preprint doi: <https://doi.org/10.1101/719740>; this version posted July 30, 2019. The copyright holder for this preprint (which was not certified by peer review) is the author/funder, who has granted bioRxiv a license to display the preprint in perpetuity. It is made available under aCC-BY 4.0 International license.

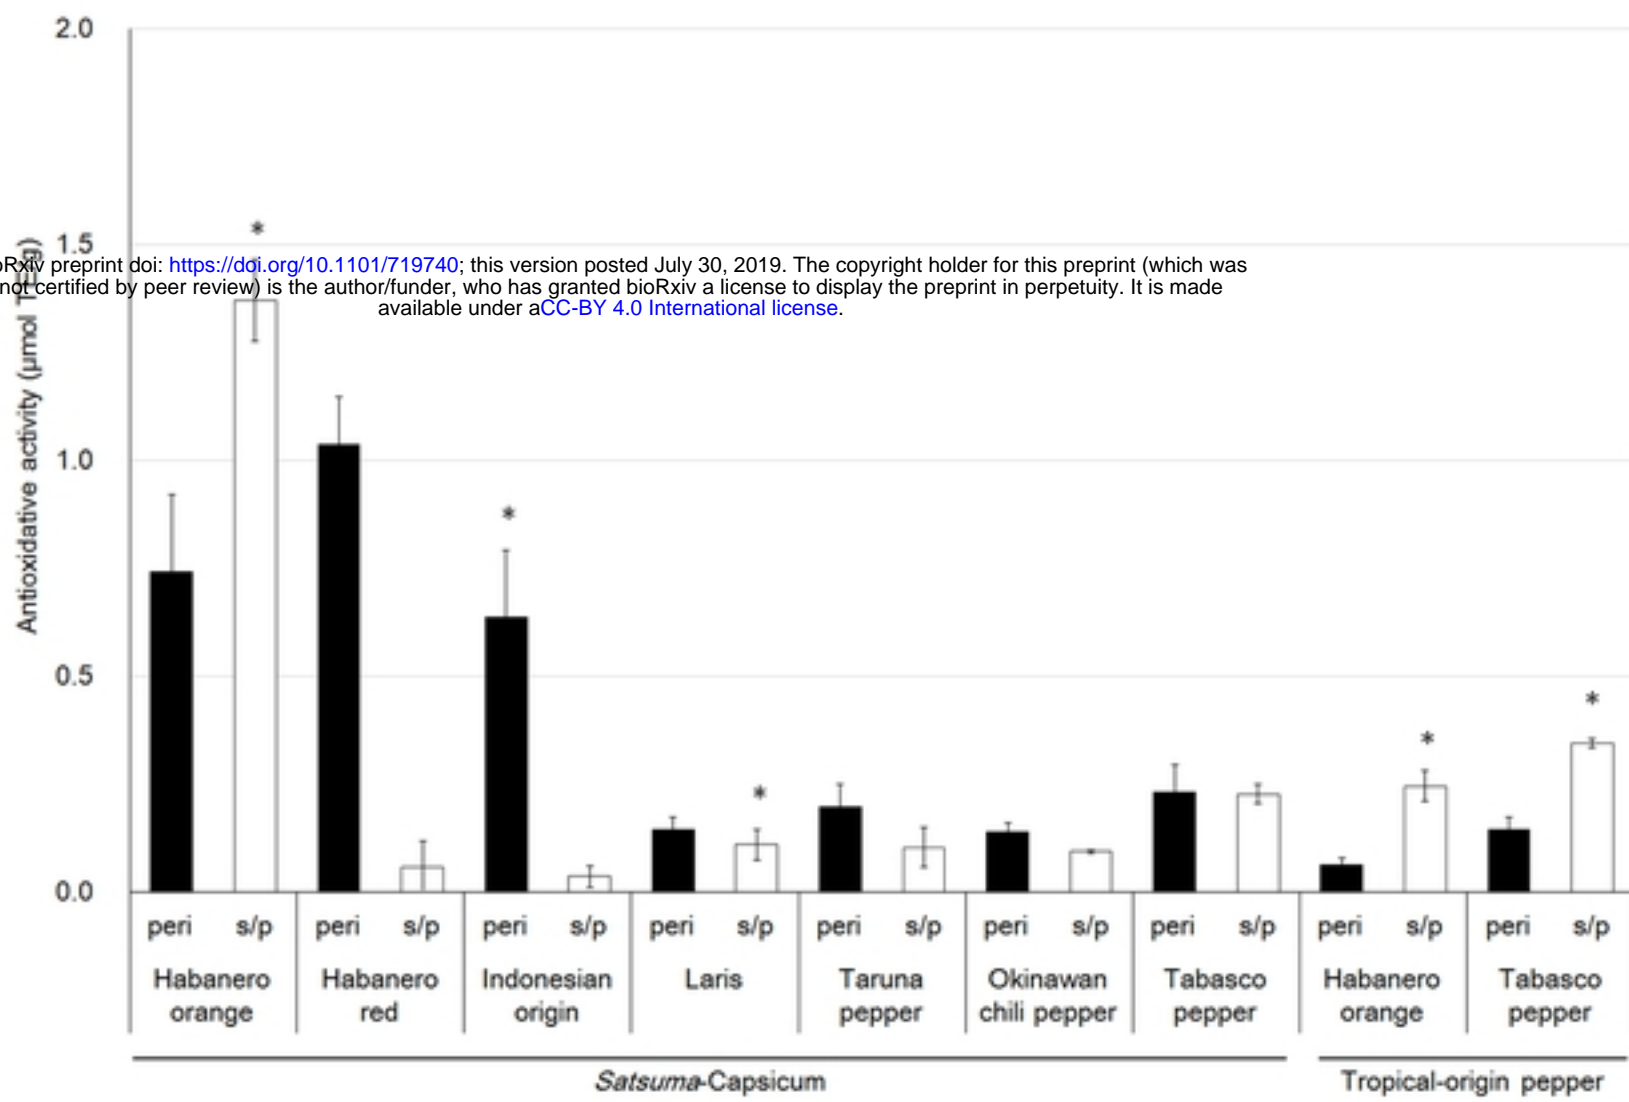

B

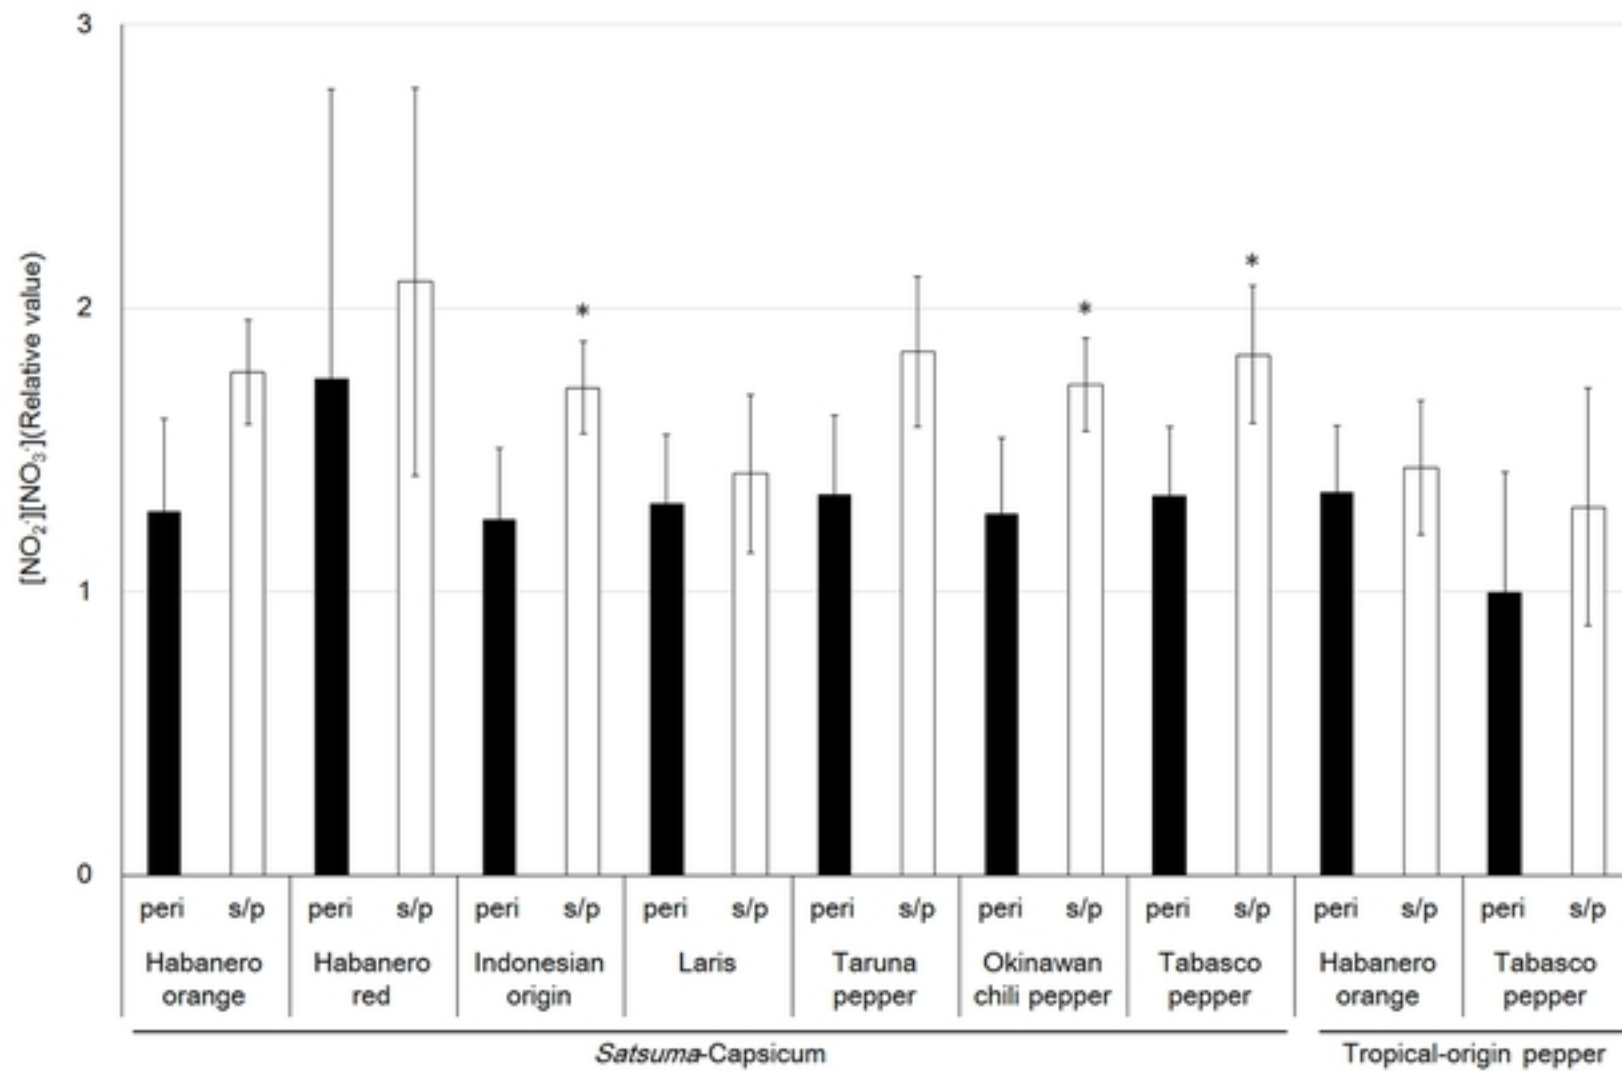

Figure4
